# Supplementary material
Source: PubMed Central journal article supplement (PMC6760859)
Supplement: NIHMS1536824-supplement-Supplemental_Material.pdf [file NIHMS1536824-supplement-Supplemental_Material.pdf]

## SUPPLEMENTAL MATERIAL

### Data Supplement 1

#### Search methods

| Databases searched                                                                                                      |
|-------------------------------------------------------------------------------------------------------------------------|
| Ovid MEDLINE(R) 1946 to April Week 4 2018                                                                               |
| Ovid MEDLINE(R) In-Process & Other Non-Indexed Citations May 08, 2018; Ovid MEDLINE(R) Epub Ahead of Print May 08, 2018 |
| Embase 1974 to present; Embase Classic 1947 to 1973 (embase.com)                                                        |
| CINAHL Plus with Full Text (EBSCOhost)                                                                                  |
| Conference Proceedings Citation Index- Science (CPCI-S) --1990-present (Web of Science)                                 |
| Cochrane Database of Systematic Reviews : Issue 5 of 12, May 2018 (Cochrane Library—Wiley)                              |
| Cochrane Central Register of Controlled Trials : Issue 4 of 12, April 2018 (Cochrane Library—Wiley)                     |
| Database of Abstracts of Reviews of Effects : Issue 2 of 4, April 2015 (Cochrane Library—Wiley)                         |
| Health Technology Assessment Database : Issue 4 of 4, October 2016 (Cochrane Library—Wiley)                             |

We searched the databases listed above on November 3, 2016 and ran search updates on May 9, 2018. For the MEDLINE search, we used the McMaster multi-term filter with the best balance of sensitivity and specificity for retrieving randomized controlled trials (Haynes 2005). For EMBASE, we translated from Ovid to embase.com syntax the multi-term EMBASE filter with the best balance of sensitivity and specificity (Wong 2006). We translated from Ovid to EBSCOhost syntax the McMaster highly sensitive filter for retrieving randomized controlled trials and systematic reviews for CINAHL (Wong 2006b). For Conference Proceedings Citation Index-Science we used a modified version of the combination of terms for identifying trials from EMBASE described in the Cochrane Handbook section 6.3.2.2 (Lefebvre 2011). In addition to the filters above, we also employed search terms to capture crossover studies and interrupted time series per the review protocol. No search filters were used in the Cochrane Library databases.

Lefebvre C, Manheimer E, Glanville J. Chapter 6: Searching for studies. In: Cochrane Handbook for Systematic Reviews of Interventions Version 5.1.0 [updated March 2011]. The Cochrane Collaboration, 2011. Available from [www.cochrane-handbook.org](http://www.cochrane-handbook.org).

Haynes, R. B., McKibbin, K. A., Wilczynski, N. L., Walter, S. D., & Werre, S. R. (2005). Optimal search strategies for retrieving scientifically strong studies of treatment from Medline: analytical survey. *BMJ*, 330(7501), 1179. doi: [bmj.38446.498542.8F](https://doi.org/10.1136/bmj.38446.498542.8F).

Wong, S. S., Wilczynski, N. L., & Haynes, R. B. (2006). Developing optimal search strategies for detecting clinically sound treatment studies in EMBASE. *J Med Libr Assoc*, 94(1), 41-47.

Wong, S. S., Wilczynski, N. L., & Haynes, R. B. (2006). Optimal CINAHL search strategies for identifying therapy studies and review articles. *J Nurs Scholarsh*, 38(2), 194-199.

## **Database search strategies**

**Database: Ovid MEDLINE(R) <1946 to April Week 4 2018>**

1. Acute Coronary Syndrome/
2. acute coronary syndrome\*.tw.
3. Myocardial Ischemia/
4. myocardial ischemi\*.tw.
5. (heart adj3 ischemi\*).tw.
6. exp Myocardial Infarction/
7. myocardial infarct\*.tw.
8. heart infarct\*.tw.
9. heart attack\*.tw.
10. (preinfarct\* or pre-infarct\*).tw.
11. (stemi or nstemi).tw.
12. exp Angina, Unstable/
13. unstable angina\*.tw.
14. or/1-13
15. "Outcome and Process Assessment (Health Care)"/
16. "Outcome Assessment (Health Care)"/
17. (outcome\* adj3 assessment\*).tw.
18. "Process Assessment (Health Care)"/
19. (process\* adj3 assessment\*).tw.
20. "Quality of Health Care"/
21. Quality Assurance, Health Care/
22. quality assurance.tw.
23. Quality Improvement/
24. quality improvement.tw.
25. (improvement adj intervention\*).tw.
26. (improvement adj program\*).tw.
27. (improvement adj initiative\*).tw.
28. (process\* adj improvement).tw.
29. Quality Indicators, Health Care/
30. quality indicator\*.tw.
31. Management Quality Circles/
32. quality circle\*.tw.
33. Reminder Systems/
34. reminder\*.tw.
35. Total Quality Management/
36. (total quality management or tqm or six sigma\*).tw.
37. Program Evaluation/
38. (program\* adj3 effectiveness).tw.
39. (program\* adj3 evaluation\*).tw.
40. Checklist/
41. (checklist\* or check list\*).tw.
42. exp Patient Education as Topic/
43. patient education.tw.
44. Health Education/
45. exp Consumer Health Information/
46. Critical Pathways/
47. critical pathway\*.tw.

48. clinical pathway\*.tw.
49. care pathway\*.tw.
50. Education, Medical, Continuing/
51. (continuing adj2 education).tw.
52. exp Inservice Training/
53. (inservice or in service).tw.
54. (staff adj3 train\*).tw.
55. Guideline Adherence/
56. Clinical Competence/
57. Peer Review, Health Care/
58. Medical Audit/
59. (audit adj3 feedback).tw.
60. or/15-59
61. 14 and 60
62. randomized controlled trial.pt. or randomized.mp. or placebo.mp.
63. Interrupted Time Series Analysis/
64. interrupted time series.tw.
65. cross-over studies/
66. (crossover or cross-over).tw.
67. or/62-66
68. 61 and 67

**Database: Ovid MEDLINE(R) In-Process & Other Non-Indexed Citations <May 08, 2018>, Ovid MEDLINE(R) Epub Ahead of Print <May 08, 2018>**

1. Acute Coronary Syndrome/
2. acute coronary syndrome\*.tw.
3. Myocardial Ischemia/
4. myocardial ischemi\*.tw.
5. (heart adj3 ischemi\*).tw.
6. exp Myocardial Infarction/
7. myocardial infarct\*.tw.
8. heart infarct\*.tw.
9. heart attack\*.tw.
10. (preinfarct\* or pre-infarct\*).tw.
11. (stemi or nstemi).tw.
12. exp Angina, Unstable/
13. unstable angina\*.tw.
14. or/1-13
15. "Outcome and Process Assessment (Health Care)"/
16. "Outcome Assessment (Health Care)"/
17. (outcome\* adj3 assessment\*).tw.
18. "Process Assessment (Health Care)"/
19. (process\* adj3 assessment\*).tw.
20. "Quality of Health Care"/
21. Quality Assurance, Health Care/
22. quality assurance.tw.
23. Quality Improvement/
24. quality improvement.tw.
25. (improvement adj intervention\*).tw.
26. (improvement adj program\*).tw.
27. (improvement adj initiative\*).tw.
28. (process\* adj improvement).tw.
29. Quality Indicators, Health Care/
30. quality indicator\*.tw.
31. Management Quality Circles/
32. quality circle\*.tw.
33. Reminder Systems/
34. reminder\*.tw.
35. Total Quality Management/
36. (total quality management or tqm or six sigma\*).tw.
37. Program Evaluation/
38. (program\* adj3 effectiveness).tw.
39. (program\* adj3 evaluation\*).tw.
40. Checklist/
41. (checklist\* or check list\*).tw.
42. exp Patient Education as Topic/
43. patient education.tw.
44. Health Education/
45. exp Consumer Health Information/
46. Critical Pathways/
47. critical pathway\*.tw.
48. clinical pathway\*.tw.

49. care pathway\*.tw.
50. Education, Medical, Continuing/
51. (continuing adj2 education).tw.
52. exp Inservice Training/
53. (inservice or in service).tw.
54. (staff adj3 train\*).tw.
55. Guideline Adherence/
56. Clinical Competence/
57. Peer Review, Health Care/
58. Medical Audit/
59. (audit adj3 feedback).tw.
60. or/15-59
61. 14 and 60

## Embase

#63

#61 AND #62

#62

[embase]/lim NOT [medline]/lim

#61

#55 AND #60

#60

#56 OR #57 OR #58 OR #59

#59

crossover:ab,ti OR 'cross over':ab,ti

#58

'crossover procedure'/de

#57

'interrupted time series':ab,ti

#56

random\*:ab,ti OR placebo\* OR ((double NEXT/1 blind\*):ab,ti)

#55

#14 AND #54

#54

#15 OR #16 OR #17 OR #18 OR #19 OR #20 OR #21 OR #22 OR #23 OR #24 OR #25 OR #26 OR #27 OR #28 OR #29 OR #30 OR #31 OR #32 OR #33 OR #34 OR #35 OR #36 OR #37 OR #38 OR #39 OR #40 OR #41 OR #42 OR #43 OR #44 OR #45 OR #46 OR #47 OR #48 OR #49 OR #50 OR #51 OR #52 OR #53

#53

'quality circle'/de OR 'quality circle\*':ab,ti

#52

(audit NEAR/3 feedback):ab,ti

#51

'medical audit'/de

#50

'peer review'/de

#49

'clinical competence'/de

#48

(adhere\* NEAR/5 guideline\*):ab,ti

#47

'good clinical practice'/de

#46

(staff NEAR/3 train\*):ab,ti

#45

'inservice':ab,ti OR 'in service':ab,ti

#44

'in service training'/de

#43

(continuing NEAR/2 education):ab,ti

#42

'care pathway\*':ab,ti

#41

'clinical pathway\*':ab,ti

#40

'critical pathway\*':ab,ti

#39

'clinical pathway'/de

#38

'consumer health information'/de

#37

'health education'/de

#36

'patient education':ab,ti

#35

'patient education'/de

#34

'checklist\*':ab,ti OR 'check list\*':ab,ti

#33

'checklist'/exp

#32

(program\* NEAR/3 effectiveness):ab,ti

#31

(program\* NEAR/3 evaluation\*):ab,ti

#30

'program evaluation'/exp

#29

'reminder\*':ab,ti

#28

'reminder system'/de

#27

'quality indicator\*':ab,ti

#26

(process\* NEAR/1 improvement):ab,ti

#25

(improvement NEAR/1 initiative\*):ab,ti

#24

(improvement NEAR/1 program\*):ab,ti

#23

(improvement NEAR/1 intervention\*):ab,ti

#22

'quality improvement':ab,ti

#21

'total quality management':ab,ti OR 'tqm':ab,ti OR 'six sigma\*':ab,ti

#20

'total quality management'/de

#19

'quality assurance':ab,ti

#18

(process\* NEAR/3 assessment\*):ab,ti

#17

'health care quality'/de

#16

(outcome\* NEAR/3 assessment\*):ab,ti

#15

'outcome assessment'/de

#14



#1 OR #2 OR #3 OR #4 OR #5 OR #6 OR #7 OR #8 OR #9 OR #10 OR #11 OR #12 OR #13

#13

'unstable angina\*':ab,ti

#12

'unstable angina pectoris'/exp

#11

'STEMI':ab,ti OR 'NSTEMI':ab,ti

#10

'preinfarct\*':ab,ti OR 'pre-infarct\*':ab,ti

#9

'heart attack\*':ab,ti

#8

'heart infarct\*':ab,ti

#7

'myocardial infarct\*':ab,ti

#6

'heart infarction'/exp

#5

(heart NEAR/3 ischemi\*):ab,ti

#4

'myocardial ischemi\*':ab,ti

#3

'heart muscle ischemia'/de

#2

'acute coronary syndrome\*':ab,ti

#1

'acute coronary syndrome'/exp

## CINAHL with Full Text (EBSCOhost)

| #   | Query                                                                                                                                                                                                                                                                                                                 |
|-----|-----------------------------------------------------------------------------------------------------------------------------------------------------------------------------------------------------------------------------------------------------------------------------------------------------------------------|
| S70 | S59 AND S69                                                                                                                                                                                                                                                                                                           |
| S69 | S63 OR S68                                                                                                                                                                                                                                                                                                            |
| S68 | S64 OR S65 OR S66 OR S67                                                                                                                                                                                                                                                                                              |
| S67 | TI crossover OR "cross over" OR AB crossover OR "cross over"                                                                                                                                                                                                                                                          |
| S66 | (MH "Crossover Design")                                                                                                                                                                                                                                                                                               |
| S65 | TI "interrupted time series" OR AB "interrupted time series"                                                                                                                                                                                                                                                          |
| S64 | (MH "Interrupted Time Series Analysis")                                                                                                                                                                                                                                                                               |
| S63 | S60 OR S61 OR S62                                                                                                                                                                                                                                                                                                     |
| S62 | PT "clinical trial"                                                                                                                                                                                                                                                                                                   |
| S61 | MH "Treatment Outcomes"                                                                                                                                                                                                                                                                                               |
| S60 | TI randomized or AB randomized                                                                                                                                                                                                                                                                                        |
| S59 | S57 AND S58                                                                                                                                                                                                                                                                                                           |
| S58 | S14 OR S15 OR S16 OR S17 OR S18 OR S19 OR S20 OR S21 OR S22 OR S23<br>OR S24 OR S25 OR S26 OR S27 OR S28 OR S29 OR S30 OR S31 OR S32 OR<br>S33 OR S34 OR S35 OR S36 OR S37 OR S38 OR S39 OR S40 OR S41 OR S42<br>OR S43 OR S44 OR S45 OR S46 OR S47 OR S48 OR S49 OR S50 OR S51 OR<br>S52 OR S53 OR S54 OR S55 OR S56 |
| S57 | S1 OR S2 OR S3 OR S4 OR S5 OR S6 OR S7 OR S8 OR S9 OR S10 OR S11 OR<br>S12 OR S13                                                                                                                                                                                                                                     |
| S56 | TI audit N3 feedback OR AB audit N3 feedback                                                                                                                                                                                                                                                                          |
| S55 | (MH "Nursing Audit")                                                                                                                                                                                                                                                                                                  |
| S54 | (MH "Clinical Competence+")                                                                                                                                                                                                                                                                                           |
| S53 | (MH "Guideline Adherence")                                                                                                                                                                                                                                                                                            |
| S52 | TI staff N3 train* OR AB staff N3 train*                                                                                                                                                                                                                                                                              |
| S51 | TI inservice OR "in service" OR AB inservice OR "in service"                                                                                                                                                                                                                                                          |
| S50 | (MH "Staff Development")                                                                                                                                                                                                                                                                                              |
| S49 | TI continuing N2 education OR AB continuing N2 education                                                                                                                                                                                                                                                              |
| S48 | (MH "Education, Continuing+")                                                                                                                                                                                                                                                                                         |
| S47 | TI "care pathway*" OR AB "care pathway*"                                                                                                                                                                                                                                                                              |

S46 TI "clinical pathway\*" OR AB "clinical pathway\*"

S45 TI "critical pathway\*" OR AB "critical pathway\*"

S44 (MH "Critical Path")

S43 (MH "Consumer Health Information+")

S42 (MH "Health Education")

S41 TI "patient education" OR AB "patient education"

S40 (MH "Patient Education")

S39 TI checklist\* OR "check list\*" OR AB checklist\* OR "check list\*"

S38 (MH "Checklists")

S37 TI program\* N3 evaluation\* OR AB program\* N3 evaluation\*

S36 TI program\* N1 effectiveness OR AB program\* N1 effectiveness

S35 (MH "Program Evaluation")

S34 (MH "Evaluation and Quality Improvement Program")

S33 TI "total quality management" OR tqm OR "six sigma\*" OR AB "total quality management" OR tqm OR "six sigma\*"

S32 TI reminder\* OR AB reminder\*

S31 (MH "Reminder Systems")

S30 TI "quality circle\*" OR AB "quality circle\*"

S29 (MH "Quality Circles")

S28 TI "clinical indicator\*" OR AB "clinical indicator\*"

S27 TI "quality indicator\*" OR AB "quality indicator\*"

S26 (MH "Clinical Indicators")

S25 TI process\* N1 improvement OR AB process\* N1 improvement

S24 TI improvement N1 initiative\* OR AB improvement N1 initiative\*

S23 TI improvement N1 program\* OR AB improvement N1 program\*

S22 TI improvement N1 intervention\* OR AB improvement N1 intervention\*

S21 TI "quality improvement" OR AB "quality improvement"

S20 TI "quality assurance" OR AB "quality assurance"

S19 (MH "Quality Assurance+")

S18 (MH "Quality of Health Care")

S17 TI process\* N3 assessment\* OR AB process\* N3 assessment\*  
S16 (MH "Process Assessment (Health Care)+")  
S15 TI outcome\* N3 assessment\* OR AB outcome\* N3 assessment\*  
S14 (MH "Outcome Assessment")  
S13 TI "unstable angina\*" OR AB "unstable angina\*"  
S12 (MH "Angina, Unstable")  
S11 TI (STEMI OR NSTEMI) OR AB (STEMI OR NSTEMI)  
S10 TI (preinfarct\* OR pre-infarct\*) OR AB (preinfarct\* OR pre-infarct\*)  
S9 TI "heart attack\*" OR AB "heart attack\*"  
S8 TI "heart infarct\*" OR AB "heart infarct\*"  
S7 TI "myocardial infarct\*" OR AB "myocardial infarct\*"  
S6 (MH "Myocardial Infarction+")  
S5 TI heart N3 ischemi\* OR AB heart N3 ischemi\*  
S4 TI "myocardial ischemi\*" OR AB "myocardial ischemi\*"  
S3 (MH "Myocardial Ischemia")  
S2 TI "acute coronary syndrome\*" OR AB "acute coronary syndrome\*"  
S1 (MH "Acute Coronary Syndrome")

**Conference Proceedings Citation Index- Science (CPCI-S) --1990-present (Web of Science)**

#5 #4 AND #3

#4 TS=(random\* OR "double-blind\*" OR placebo\* OR crossover\* OR "cross-over\*" OR "interrupted time series")

#3 #2 AND #1

#2 TS=((outcome\* NEAR/3 assessment\*) OR (process\* NEAR/3 assessment\*) OR "quality assurance" OR "quality improvement" OR (improvement NEAR/1 intervention\*) OR (improvement NEAR/1 program\*) OR (improvement NEAR/1 initiative\*) OR "quality indicator\*" OR "quality circle\*" OR reminder\* OR "total quality management" OR tqm OR "six sigma\*" OR (program\* NEAR/3 effectiveness) OR (program\* NEAR/3 evaluation\*) OR checklist\* OR "check list\*" OR "patient education" OR "consumer health information" OR "critical pathway\*" OR "clinical pathway\*" OR "care pathway\*" OR (continuing NEAR/2 education) OR inservice OR "in service" OR (staff NEAR/3 train\*) OR (adhere\* NEAR/5 guideline\*) OR "clinical competence" OR "medical audit" OR (audit NEAR/3 feedback))

#1 TS=("acute coronary syndrome\*" OR "myocardial ischemi\*" OR (heart NEAR/3 ischemi\*) OR "myocardial infarct\*" OR "heart infarct\*" OR "heart attack\*" OR preinfarct\* OR "pre-infarct\*" OR stemi OR nstemi OR "unstable angina\*")

**Cochrane Library Databases (Wiley)**

**Cochrane Database of Systematic Reviews : Issue 5 of 12, May 2018**

**Cochrane Central Register of Controlled Trials : Issue 4 of 12, April 2018**

**Database of Abstracts of Reviews of Effect : Issue 2 of 4, April 2015**

**Health Technology Assessment Database : Issue 4 of 4, October 2016**

- ID Search
- #1 MeSH descriptor: [Acute Coronary Syndrome] this term only
  - #2 "acute coronary syndrome\*":ab,ti,kw
  - #3 MeSH descriptor: [Myocardial Ischemia] this term only
  - #4 "myocardial ischemi\*":ab,ti,kw
  - #5 (heart near/3 ischemi\*):ab,ti,kw
  - #6 MeSH descriptor: [Myocardial Infarction] explode all trees
  - #7 "myocardial infarct\*":ab,ti,kw
  - #8 "heart infarct\*":ab,ti,kw
  - #9 "heart attack\*":ab,ti,kw
  - #10 "preinfarct\*":ab,ti,kw or "pre-infarct\*":ab,ti,kw
  - #11 stemi:ab,ti,kw or nstemi:ab,ti,kw
  - #12 MeSH descriptor: [Angina, Unstable] explode all trees
  - #13 "unstable angina":ab,ti,kw
  - #14 {or #1-#13}
  - #15 MeSH descriptor: [Outcome and Process Assessment (Health Care)] this term only
  - #16 MeSH descriptor: [Outcome Assessment (Health Care)] this term only
  - #17 (outcome\* near/3 assessment\*):ab,ti,kw
  - #18 MeSH descriptor: [Process Assessment (Health Care)] this term only
  - #19 (process\* near/3 assessment\*):ab,ti,kw
  - #20 MeSH descriptor: [Quality of Health Care] this term only
  - #21 MeSH descriptor: [Quality Assurance, Health Care] this term only
  - #22 "quality assurance":ab,ti,kw
  - #23 MeSH descriptor: [Quality Improvement] this term only
  - #24 "quality improvement":ab,ti,kw
  - #25 (improvement near/1 intervention\*):ab,ti,kw
  - #26 (improvement near/1 program\*):ab,ti,kw
  - #27 (improvement near/1 initiative\*):ab,ti,kw
  - #28 (process\* near/1 improvement):ab,ti,kw
  - #29 MeSH descriptor: [Quality Indicators, Health Care] this term only
  - #30 "quality indicator\*":ab,ti,kw
  - #31 MeSH descriptor: [Management Quality Circles] this term only
  - #32 "quality circle\*":ab,ti,kw
  - #33 MeSH descriptor: [Reminder Systems] this term only
  - #34 reminder\*:ab,ti,kw
  - #35 MeSH descriptor: [Total Quality Management] this term only
  - #36 "total quality management":ab,ti,kw or "tqm":ab,ti,kw or "six sigma\*":ab,ti,kw
  - #37 MeSH descriptor: [Program Evaluation] this term only
  - #38 (program\* near/3 evaluation\*):ab,ti,kw
  - #39 (program\* near/3 effectiveness):ab,ti,kw
  - #40 MeSH descriptor: [Checklist] this term only
  - #41 "checklist\*":ab,ti or "check list\*":ab,ti,kw
  - #42 MeSH descriptor: [Patient Education as Topic] explode all trees
  - #43 "patient education":ab,ti,kw
  - #44 MeSH descriptor: [Health Education] this term only

#45 MeSH descriptor: [Consumer Health Information] explode all trees  
#46 MeSH descriptor: [Critical Pathways] this term only  
#47 "critical pathway\*":ab,ti,kw  
#48 "clinical pathway\*":ab,ti,kw  
#49 "care pathway\*":ab,ti,kw  
#50 MeSH descriptor: [Education, Medical, Continuing] this term only  
#51 (continuing near/2 education):ab,ti,kw  
#52 MeSH descriptor: [Inservice Training] explode all trees  
#53 "inservice":ab,ti,kw or "in service":ab,ti,kw  
#54 (staff near/3 train\*):ab,ti,kw  
#55 MeSH descriptor: [Guideline Adherence] this term only  
#56 (adhere\* near/5 guideline\*):ab,ti,kw  
#57 MeSH descriptor: [Clinical Competence] this term only  
#58 MeSH descriptor: [Peer Review, Health Care] this term only  
#59 MeSH descriptor: [Medical Audit] this term only  
#60 (audit near/3 feedback):ab,ti,kw  
#61 {or #15-#60}  
#62 #14 and #61

## **Trials Register Searches**

### **ClinicalTrials.gov**

Search dates: February 14, 2017 (109 unique records) and May 16, 2018 (54 unique records). We de-duplicated the 2018 records against the 2017 result set. Due to character limits in ClinicalTrials.gov, we broke up the search into four segments.

("acute coronary" OR "myocardial ischemia" OR "myocardial infarction" OR angina) AND ("quality improvement" OR "quality assessment" OR "outcome assessment" OR "process assessment" OR "quality assurance" OR "improvement intervention")

<https://goo.gl/ygZbAA>

("acute coronary" OR "myocardial ischemia" OR "myocardial infarction" OR angina) AND ("improvement program" OR "improvement initiative" OR "quality indicator" OR "quality circle" OR "reminder system" OR "total quality management")

<https://goo.gl/B8BZB8>

("acute coronary" OR "myocardial ischemia" OR "myocardial infarction" OR angina) AND ("program evaluation" OR "program effectiveness" OR checklist OR "patient education" OR "health education" OR "consumer health")

<https://goo.gl/4adY4b>

("acute coronary" OR "myocardial ischemia" OR "myocardial infarction" OR angina) AND ("critical pathway" OR "clinical pathway" OR "care pathway" OR inservice OR "guideline adherence" OR audit)

<https://goo.gl/BBIOYt>



**Data supplement 2. Characteristics of included controlled quasi-experimental studies.**

| <b>Study</b>                              | <b>Setting</b>                                                                          | <b>N</b>                                                              | <b>Population</b>   | <b>Intervention vs. comparator</b>                                                                                                                   | <b>1° and key 2° outcomes</b>                                                                                               |
|-------------------------------------------|-----------------------------------------------------------------------------------------|-----------------------------------------------------------------------|---------------------|------------------------------------------------------------------------------------------------------------------------------------------------------|-----------------------------------------------------------------------------------------------------------------------------|
| Carlhed 2006 <sup>23</sup><br>2001-2004   | Controlled before and after study at multisite national registry participants in Sweden | <b>I:</b> 19 hospitals<br><b>C:</b> 19 hospitals<br><b>TP:</b> 6,726  | Patients with AMI   | <b>Intervention 1:</b> Rigorous education program<br><br><b>Intervention 2:</b> Less rigorous education program<br><br><b>Comparator:</b> Usual care | Guideline directed in-hospital and discharge medications                                                                    |
| Carlhead 2009 <sup>24</sup><br>2001-2004  | Controlled before and after study at multisite national registry participants in Sweden | <b>I:</b> 19 hospitals<br><b>C:</b> 19 hospitals<br><b>TP:</b> 13,362 | Patients with AMI   | <b>Intervention 1:</b> Rigorous education program<br><br><b>Intervention 2:</b> Less rigorous education program<br><br><b>Comparator:</b> Usual care | Guideline directed in-hospital and discharge medications, in-hospital mortality                                             |
| Chen 2011 <sup>25</sup><br>2008-2009      | Controlled before and after study at a single center in China                           | <b>I:</b> 54 patients<br><b>C:</b> 51 patients<br><b>TP:</b> 105      | Patients with STEMI | <b>Intervention:</b> Tele-ECG triage system<br><br><b>Comparator:</b> Usual care                                                                     | Door to balloon time, rates of PCI < 90 minutes                                                                             |
| Ellerbeck 2000 <sup>27</sup><br>1992-1995 | Controlled before and after study in Iowa, US                                           | <b>I:</b> 44 hospitals<br><b>C:</b> 73 hospitals<br><b>TP:</b> 113    | Patients with AMI   | <b>Intervention:</b> Targeted performance feedback and subsequent intervention based on feedback<br><br><b>Comparator:</b> Usual care                | Reperfusion within 12 hours of arrival, thrombolysis < 60 minutes, guideline directed in-hospital and discharge medications |
| Fakhr-Movahedi 2015 <sup>27</sup>         | Non-randomized intervention vs. control study in Semnan, Iran                           | <b>I:</b> 69 patients<br><b>C:</b> 69 patients<br><b>TP:</b> 138      | Patients with AMI   | <b>Intervention:</b> Clinical pathway<br><br><b>Comparator:</b> Usual care                                                                           | Levels of patient anxiety, depression, and satisfaction                                                                     |

|                                                                                                                                                                                                                                                               |                                                                        |                                                                   |                   |                                                                                                            |                                                                       |
|---------------------------------------------------------------------------------------------------------------------------------------------------------------------------------------------------------------------------------------------------------------|------------------------------------------------------------------------|-------------------------------------------------------------------|-------------------|------------------------------------------------------------------------------------------------------------|-----------------------------------------------------------------------|
| Robinson 1996 <sup>35</sup><br>1991-1992                                                                                                                                                                                                                      | Time-series controlled before and after study in the UK                | <b>I:</b> 4 hospitals<br><b>C:</b> 1 hospital<br><b>TP:</b> 2,593 | Patients with AMI | <b>Intervention:</b> Audit and feedback and subsequent interventions<br><br><b>Comparator:</b> Usual care  | Use of thrombolytic therapy in eligible patients                      |
| Scott 2001 <sup>37</sup><br>1991-1999                                                                                                                                                                                                                         | Non-randomized intervention vs. control study in Queensland, Australia | <b>I:</b> 335 patients<br><b>C:</b> 98 patients<br><b>TP:</b> 433 | Patients with AMI | <b>Intervention:</b> Clinical guidelines, regular audits and feedback<br><br><b>Comparator:</b> Usual care | In-hospital mortality, guideline directed medications and reperfusion |
| <p>I: intervention, C: comparator, STEMI: ST-elevation myocardial infarction, AMI: acute myocardial infarction, PCI: percutaneous coronary intervention TP: total participants. QI: quality improvement, 1<sup>o</sup>: primary, 2<sup>o</sup>: secondary</p> |                                                                        |                                                                   |                   |                                                                                                            |                                                                       |

**Data Supplement 3. Characteristics of included uncontrolled quasi-experimental study design.**

| <b>Study</b>                              | <b>Study design &amp; setting</b>                                                  | <b>N</b>                                                                          | <b>Population</b>                                 | <b>Intervention</b>                                                                                                                    | <b>1° and key 2° outcomes</b>                                                                            |
|-------------------------------------------|------------------------------------------------------------------------------------|-----------------------------------------------------------------------------------|---------------------------------------------------|----------------------------------------------------------------------------------------------------------------------------------------|----------------------------------------------------------------------------------------------------------|
| Alexander 2017 <sup>21</sup><br>2012-2014 | Before and after study;<br>Tamil Nadu, India                                       | Pre: 2420 patients<br>Post: 1522 patients<br>TP: 3942                             | Patients with STEMI                               | Regional QI program that linked non-PCI to large PCI hub hospitals                                                                     | Rates of reperfusion, timely reperfusion, post fibrinolysis angioplasty, 1-year mortality                |
| Aziz 2012 <sup>22</sup><br>2004-2005      | Before and after study;<br>New York, USA                                           | Pre: 215 patients<br>Post: 269 patients<br>TP: 484                                | Patients with AMI                                 | Clinical pathways, check-lists, educational material                                                                                   | Guideline directed In-hospital and discharge medications, behavioral counseling, MACE in first 12 months |
| Dai 2016 <sup>26</sup><br>2007-2011       | Before and after study;<br>University of North Carolina, USA                       | Pre: 45 patients<br>Post: 51 patients<br>TP: 96                                   | Inpatients who developed STEMI while hospitalized | Educational material                                                                                                                   | Symptom to ECG time, ECG to thrombolysis and catheterization time                                        |
| Feng-Yu 2013 <sup>29</sup><br>2005-2008   | Before and after study at a single center veteran's hospital;<br>Kaoshiung, Taiwan | Baseline: 86 patients<br>Stage 1: 80 patients<br>Stage 2: 219 patients<br>TP: 385 | STEMI patients who received PCI                   | <b>Stage 1:</b> Intra-hospital clinical pathway.<br><b>Stage 2:</b> STEMI network to improve inter-hospital communication and transfer | Door to balloon time, in-hospital mortality, guideline directed admission and discharge medications      |
| Fonarow 2003 <sup>30</sup><br>1992-1995   | Before and after study;<br>California, USA                                         | Pre: 256 patients<br>Post: 302 patients<br>TP: 558                                | Patients with AMI                                 | Critical pathways, order sets, checklists, educational material, feedback reports (CHAMP)                                              | Guideline directed discharge medications, 1- year clinical events                                        |
| Khot 2007 <sup>31</sup><br>2004-2006      | Before and after study;<br>Indiana, USA                                            | Pre: 60 patients<br>Post: 86 patients<br>TP: 148                                  | STEMI patients who received PCI within 24 hours   | Clinical protocol and an emergency heart attack response team                                                                          | Door to balloon time, rates of PCI < 90 minutes, door to ECG time, in-hospital mortality                 |

|                                             |                                                  |                                                           |                                 |                                                                   |                                                                                     |
|---------------------------------------------|--------------------------------------------------|-----------------------------------------------------------|---------------------------------|-------------------------------------------------------------------|-------------------------------------------------------------------------------------|
| Lai 2009 <sup>32</sup><br>2206-2007         | Before and after study;<br>Taiwan                | Pre: 104 patients<br>Post: 76 patients<br>TP: 180         | STEMI patients destined for PCI | Audit and feedback program                                        | Door to balloon time                                                                |
| Prabhakaran 2008 <sup>33</sup><br>2005-2006 | Before and after study;<br>Kerala, India         | Pre: 34 hospitals<br>Post: 34 hospitals<br>TP: 1032       | Patients with AMI               | Admission orders, discharge instructions, educational material    | Door to needle time, time to thrombolysis guideline directed discharge medications  |
| Scholz 2017 <sup>34</sup><br>2007-2009      | Before and after multiregional study;<br>Germany | Pre: 226 patients<br>Post: 194 patients<br>TP: 420        | Patients with STEMI             | Quarterly data feedback                                           | Door to balloon time, in-hospital and 30-day mortality                              |
| Scott 2000 <sup>36</sup><br>1996-1998       | Before and after study;<br>Queensland, Australia | Pre: 11277 patients<br>Post: 11568 patients<br>TP: 22,845 | Patients with AMI               | Evidence based clinical guidelines disseminated to hospital staff | Guideline directed medications and reperfusion, in-hospital MACE                    |
| Scott 2004 <sup>38</sup><br>2000-2002       | Before and after study;<br>Brisbane, Australia   | Pre: 428 patients<br>Post: 435 patients<br>TP: 863        | Patients with AMI               | Reminder tools, educational intervention, performance feedback    | Guideline directed discharge medications, key diagnostics and in-hospital mortality |

Pre: pre- intervention, post: post-intervention, TP: total participants, MACE: major adverse cardiovascular events, RCT: randomized controlled trial, AMI: acute myocardial infarction, STEMI: ST-elevation myocardial infarction, NSTEMI: non-ST elevation myocardial infarction; QI: quality improvement, AMI: acute myocardial infarction.

**Data Supplement 4. Risk of bias assessments for included randomized controlled trials.**

| <b>Bailey 2007 N= 853</b>                                 |                           |                                                                                                                                                                                                                                                                                                                                                                                                          |
|-----------------------------------------------------------|---------------------------|----------------------------------------------------------------------------------------------------------------------------------------------------------------------------------------------------------------------------------------------------------------------------------------------------------------------------------------------------------------------------------------------------------|
| <b>Domain</b>                                             | <b>Authors' judgement</b> | <b>Support for judgement</b>                                                                                                                                                                                                                                                                                                                                                                             |
| Random sequence generation (selection bias)               | Unclear risk              | Method of random sequence generation not reported.                                                                                                                                                                                                                                                                                                                                                       |
| Allocation concealment (selection bias)                   | Unclear risk              | Method of allocation concealment not reported                                                                                                                                                                                                                                                                                                                                                            |
| Blinding of participants and personnel (performance bias) | High risk                 | Unblinded study.                                                                                                                                                                                                                                                                                                                                                                                         |
| Blinding of outcome assessment (detection bias)           | Low risk                  | Outcome assessors were unblinded; however, outcome measures were objective and not likely to be affected by unblinding of outcome assessors.                                                                                                                                                                                                                                                             |
| Incomplete outcome data (attrition bias)                  | Low risk                  | >80% of included patients in the study also included in the analysis.                                                                                                                                                                                                                                                                                                                                    |
| Selective reporting (reporting bias)                      | Unclear risk              | No access to study protocol to assess potential selective reporting bias.                                                                                                                                                                                                                                                                                                                                |
| Other bias                                                | High risk                 | Cross contamination bias: "There were 27 patients in the control arms and 15 patients in the intervention arm with cross contaminations. These patients were excluded from the analysis".                                                                                                                                                                                                                |
| Other bias                                                | High risk                 | Recruitment bias: "We did not include some patients who may have benefited from the intervention. For example, automated detection of elevation in troponin levels was the mechanism for identifying potential candidates for intervention. Therefore, patients with acute coronary syndrome or established coronary heart disease without an elevated troponin I level were not included in our study." |

| <b>Brener 2003 N= 2,210</b>                               |                           |                                                    |
|-----------------------------------------------------------|---------------------------|----------------------------------------------------|
| <b>Domain</b>                                             | <b>Authors' judgement</b> | <b>Support for judgement</b>                       |
| Random sequence generation (selection bias)               | Unclear risk              | Method of random sequence generation not reported. |
| Allocation concealment (selection bias)                   | Unclear risk              | Method of allocation concealment not reported      |
| Blinding of participants and personnel (performance bias) | High risk                 | Unblinded study.                                   |

|                                                 |              |                                                                                                                                                                      |
|-------------------------------------------------|--------------|----------------------------------------------------------------------------------------------------------------------------------------------------------------------|
| Blinding of outcome assessment (detection bias) | Low risk     | Outcome assessors were unblinded; however, outcome measures were objective and not likely to be affected by unblinding of outcome assessors.                         |
| Incomplete outcome data (attrition bias)        | Low risk     | One cluster hospital out of 21 randomized hospitals withdrew from the study and before implementation of the intervention. This hospital was excluded from analysis. |
| Selective reporting (reporting bias)            | Unclear risk | No access to trial register protocol to assess potential selective reporting bias.                                                                                   |

| <b>Berwanger 2012 N= 1,150</b>                            |                           |                                                                                                                                                              |
|-----------------------------------------------------------|---------------------------|--------------------------------------------------------------------------------------------------------------------------------------------------------------|
| <b>Domain</b>                                             | <b>Authors' judgement</b> | <b>Support for judgement</b>                                                                                                                                 |
| Random sequence generation (selection bias)               | Low risk                  | "All clusters were randomized at once on by a statistician using a central web-based randomization system before enrollment of the first patient."           |
| Allocation concealment (selection bias)                   | Low risk                  | "The survey was conducted prior to randomization to avoid potential systematic errors caused by awareness of allocation of intervention and control groups." |
| Blinding of participants and personnel (performance bias) | High risk                 | Unblinded study.                                                                                                                                             |
| Blinding of outcome assessment (detection bias)           | Low risk                  | Outcome assessors were unblinded; however, outcome measures were objective and not likely to be affected by unblinding of outcome assessors.                 |
| Incomplete outcome data (attrition bias)                  | Low risk                  | No loss of clusters reported.                                                                                                                                |
| Selective reporting (reporting bias)                      | Low risk                  | Outcomes in final study publication included all outcomes included in published trial register. NCT00958958                                                  |
| Other bias                                                | Low risk                  | None identified                                                                                                                                              |

| <b>Du 2014 N= 3,500</b>                     |                           |                                                                                                                                              |
|---------------------------------------------|---------------------------|----------------------------------------------------------------------------------------------------------------------------------------------|
| <b>Domain</b>                               | <b>Authors' judgement</b> | <b>Support for judgement</b>                                                                                                                 |
| Random sequence generation (selection bias) | Low risk                  | "Using a central computer-based system, 70 participating hospitals were randomly allocated, stratified by hospital level, to 1 of 2 groups." |

|                                                           |              |                                                                                                                                              |
|-----------------------------------------------------------|--------------|----------------------------------------------------------------------------------------------------------------------------------------------|
| Allocation concealment (selection bias)                   | Low risk     | All clusters randomized at once using a central computer-based system, which minimizes risk of allocation concealment.                       |
| Blinding of participants and personnel (performance bias) | Unclear risk | Unblinded study.                                                                                                                             |
| Blinding of outcome assessment (detection bias)           | Low risk     | Outcome assessors were unblinded; however, outcome measures were objective and not likely to be affected by unblinding of outcome assessors. |
| Incomplete outcome data (attrition bias)                  | Low risk     | No loss of clusters reported                                                                                                                 |
| Selective reporting (reporting bias)                      | Low risk     | Outcomes in final study publication included all outcomes included in published trial register. ACTRN12609000491268                          |
| Other bias                                                | Unclear risk | Recruitment bias: There was a difference of 6 hospitals between the two arms.                                                                |

| <b>Flather 2003 N= 2,622</b>                              |                           |                                                                                                                                                                                                                                                  |
|-----------------------------------------------------------|---------------------------|--------------------------------------------------------------------------------------------------------------------------------------------------------------------------------------------------------------------------------------------------|
| <b>Domain</b>                                             | <b>Authors' judgement</b> | <b>Support for judgement</b>                                                                                                                                                                                                                     |
| Random sequence generation (selection bias)               | Unclear risk              | Method of random sequence generation not specified.                                                                                                                                                                                              |
| Allocation concealment (selection bias)                   | Unclear risk              | Method of allocation concealment not reported                                                                                                                                                                                                    |
| Blinding of participants and personnel (performance bias) | High risk                 | Unblinded study.                                                                                                                                                                                                                                 |
| Blinding of outcome assessment (detection bias)           | Low risk                  | Outcome assessors were unblinded; however, outcome measures were objective and not likely to be affected by unblinding of outcome assessors.                                                                                                     |
| Incomplete outcome data (attrition bias)                  | Low risk                  | Out of 40 clusters, one cluster withdrew prior to randomization, and one study withdrew after randomization prior to implementation of QI training. Final randomization of 19 clusters in each arm.                                              |
| Selective reporting (reporting bias)                      | Unclear risk              | Outcomes in final study publication included all outcomes included in published trial register. NCT00716430                                                                                                                                      |
| Other bias                                                | Unclear risk              | Recruitment bias: The paper does not explicitly list cluster characteristics. Unclear balance of community vs teaching vs. small vs. large sized facilities. The stratification only done at the level of PCI or no PCI facility and by country. |

| <b>Guenancia 2016 N= 572</b>                              |                           |                                                                                                                                                                                        |
|-----------------------------------------------------------|---------------------------|----------------------------------------------------------------------------------------------------------------------------------------------------------------------------------------|
| <b>Domain</b>                                             | <b>Authors' judgement</b> | <b>Support for judgement</b>                                                                                                                                                           |
| Random sequence generation (selection bias)               | Unclear risk              | Method of random sequence generation not specified.                                                                                                                                    |
| Allocation concealment (selection bias)                   | High risk                 | The local investigator allocated patients to either arm using a 1:1 randomization ratio, which suggests that the investigator may have been able to influence the allocation schedule. |
| Blinding of participants and personnel (performance bias) | High risk                 | Unblinded study,                                                                                                                                                                       |
| Blinding of outcome assessment (detection bias)           | Low risk                  | Outcome assessors were unblinded; however, outcome measures were objective and not likely to be affected by unblinding of outcome assessors.                                           |
| Incomplete outcome data (attrition bias)                  | Low risk                  | No loss of participants reported                                                                                                                                                       |
| Selective reporting (reporting bias)                      | Unclear risk              | No access to trial register protocol to assess potential selective reporting bias.                                                                                                     |
| Other bias                                                | High risk                 | Recruitment bias: Informed consent from patient participants was required to participate in the study.                                                                                 |

| <b>Heller 2001 N= 3,242</b>                               |                           |                                                                                                                                              |
|-----------------------------------------------------------|---------------------------|----------------------------------------------------------------------------------------------------------------------------------------------|
| <b>Domain</b>                                             | <b>Authors' judgement</b> | <b>Support for judgement</b>                                                                                                                 |
| Random sequence generation (selection bias)               | Unclear risk              | Method of random sequence generation not specified.                                                                                          |
| Allocation concealment (selection bias)                   | Unclear risk              | Method of allocation concealment not reported                                                                                                |
| Blinding of participants and personnel (performance bias) | High risk                 | Unblinded study.                                                                                                                             |
| Blinding of outcome assessment (detection bias)           | Low risk                  | Outcome assessors were unblinded; however, outcome measures were objective and not likely to be affected by unblinding of outcome assessors. |



|                                          |              |                                                                                                                                                                                                                      |
|------------------------------------------|--------------|----------------------------------------------------------------------------------------------------------------------------------------------------------------------------------------------------------------------|
| Incomplete outcome data (attrition bias) | Unclear risk | Of the 48 hospitals included in the baseline survey, 36 took part in the follow-up survey. 12 were omitted to allow comparison of the same hospitals. Unclear what level of hospitals were excluded in the analysis. |
| Selective reporting (reporting bias)     | Unclear risk | No access to trial register protocol to assess potential selective reporting bias.                                                                                                                                   |
| Other bias                               | High risk    | Recruitment bias: Control hospitals had significantly higher proportion of patients with severe illness at both baseline and follow-up compared to intervention hospitals.                                           |

| <b>Huffman 2018 N= 21,374</b>                             |                           |                                                                                                                                                                                                                                                                         |
|-----------------------------------------------------------|---------------------------|-------------------------------------------------------------------------------------------------------------------------------------------------------------------------------------------------------------------------------------------------------------------------|
| <b>Domain</b>                                             | <b>Authors' judgement</b> | <b>Support for judgement</b>                                                                                                                                                                                                                                            |
| Random sequence generation (selection bias)               | Low risk                  | The study biostatisticians performed central, computer-based randomization of hospitals.                                                                                                                                                                                |
| Allocation concealment (selection bias)                   | Low risk                  | Central randomization; the study team and the selected sites were informed of the 12 or 13 sites that would cross-over to the intervention period two weeks before each of the pre-defined steps to maintain allocation concealment while aiding in training logistics. |
| Blinding of participants and personnel (performance bias) | High risk                 | Unblinded study.                                                                                                                                                                                                                                                        |
| Blinding of outcome assessment (detection bias)           | Low risk                  | Outcome assessors were unblinded, however, outcome measures were objective and not likely to be affected by unblinding of outcome assessors.                                                                                                                            |
| Incomplete outcome data (attrition bias)                  | Low risk                  | No loss of clusters reported.                                                                                                                                                                                                                                           |
| Selective reporting (reporting bias)                      | Low risk                  | Outcomes published in protocol are included (NCT02256657)                                                                                                                                                                                                               |
| Other bias                                                | Unclear risk              | Recruitment bias: Informed consent from patient participants was required to participate in the study but participant characteristics were largely similar between intervention and comparator groups.                                                                  |

| <b>Kinsman 2012 N=108</b>                                 |                           |                                                                                                                                                                    |
|-----------------------------------------------------------|---------------------------|--------------------------------------------------------------------------------------------------------------------------------------------------------------------|
| <b>Domain</b>                                             | <b>Authors' judgement</b> | <b>Support for judgement</b>                                                                                                                                       |
| Random sequence generation (selection bias)               | Low risk                  | Simple coin toss used for random sequence generation.                                                                                                              |
| Allocation concealment (selection bias)                   | Low risk                  | Method of allocation concealment not reported; however, randomization carried out ahead of study which limits risk of allocation concealment bias in cluster RCTs. |
| Blinding of participants and personnel (performance bias) | High risk                 | Unblinded study.                                                                                                                                                   |
| Blinding of outcome assessment (detection bias)           | Low risk                  | Outcome assessors were unblinded; however, outcome measures were objective and not likely to be affected by unblinding of outcome assessors.                       |
| Incomplete outcome data (attrition bias)                  | Low risk                  | No loss of clusters reported.                                                                                                                                      |
| Selective reporting (reporting bias)                      | Low risk                  | Outcomes in final study publication included all outcomes included in published trial register. ANZCTR12608000209392.                                              |
| Other bias                                                | Low risk                  | None identified                                                                                                                                                    |

| <b>Lytle 2015 N= 19,579</b>                               |                           |                                                                                                                                              |
|-----------------------------------------------------------|---------------------------|----------------------------------------------------------------------------------------------------------------------------------------------|
| <b>Domain</b>                                             | <b>Authors' judgement</b> | <b>Support for judgement</b>                                                                                                                 |
| Random sequence generation (selection bias)               | Unclear risk              | Method of random sequence generation not specified.                                                                                          |
| Allocation concealment (selection bias)                   | Unclear risk              | Method of allocation concealment not reported                                                                                                |
| Blinding of participants and personnel (performance bias) | High risk                 | Unblinded study.                                                                                                                             |
| Blinding of outcome assessment (detection bias)           | Low risk                  | Outcome assessors were unblinded; however, outcome measures were objective and not likely to be affected by unblinding of outcome assessors. |
| Incomplete outcome data (attrition bias)                  | Unclear risk              | Loss of 16 hospitals from the intervention group and 9 hospitals from the control group. Unclear which types of hospitals were lost.         |
| Selective reporting (reporting bias)                      | Low risk                  | No access to trial register protocol to assess potential selective reporting bias                                                            |
| Other bias                                                | Low risk                  | None identified                                                                                                                              |

| <b>Sauaia 2000 N= 1367</b>                                |                           |                                                                                                                                                            |
|-----------------------------------------------------------|---------------------------|------------------------------------------------------------------------------------------------------------------------------------------------------------|
| <b>Domain</b>                                             | <b>Authors' judgement</b> | <b>Support for judgement</b>                                                                                                                               |
| Random sequence generation (selection bias)               | Unclear risk              | Method of random sequence generation not specified.                                                                                                        |
| Allocation concealment (selection bias)                   | Unclear risk              | Method of allocation concealment not reported                                                                                                              |
| Blinding of participants and personnel (performance bias) | High risk                 | Unblinded study                                                                                                                                            |
| Blinding of outcome assessment (detection bias)           | Low risk                  | Outcome assessors were unblinded, however, outcome measures were objective and not likely to be affected by unblinding of outcome assessors.               |
| Incomplete outcome data (attrition bias)                  | Low risk                  | One urban hospital from control group withdrew from study. To balance it out another urban hospital from the intervention group dropped from the analysis. |
| Selective reporting (reporting bias)                      | Unclear risk              | No access to trial register protocol to assess potential selective reporting bias                                                                          |
| Other bias                                                | Low risk                  | None identified                                                                                                                                            |

| <b>Soumerai 1998 N= 5,347</b>                             |                           |                                                                                                                                              |
|-----------------------------------------------------------|---------------------------|----------------------------------------------------------------------------------------------------------------------------------------------|
| <b>Domain</b>                                             | <b>Authors' judgement</b> | <b>Support for judgement</b>                                                                                                                 |
| Random sequence generation (selection bias)               | Unclear risk              | Method of randomization not specified.                                                                                                       |
| Allocation concealment (selection bias)                   | Unclear risk              | Method of allocation concealment not reported.                                                                                               |
| Blinding of participants and personnel (performance bias) | High risk                 | Unblinded study.                                                                                                                             |
| Blinding of outcome assessment (detection bias)           | Low risk                  | Outcome assessors were unblinded; however, outcome measures were objective and not likely to be affected by unblinding of outcome assessors. |
| Incomplete outcome data (attrition bias)                  | Unclear risk              | One hospital from control group closed and was excluded from the analysis.                                                                   |

|                                      |              |                                                                                                                                                                                                                                                                                                                                                                                                                                                                  |
|--------------------------------------|--------------|------------------------------------------------------------------------------------------------------------------------------------------------------------------------------------------------------------------------------------------------------------------------------------------------------------------------------------------------------------------------------------------------------------------------------------------------------------------|
| Selective reporting (reporting bias) | Unclear risk | No access to trial register protocol to assess potential selective reporting bias.                                                                                                                                                                                                                                                                                                                                                                               |
| Other bias                           | High risk    | Recruitment bias: Baseline imbalance of cluster arms reported. "To minimize contamination of control hospitals, large cities were randomized as clusters, resulting in a statewide sample of 20 experimental and 17 control hospitals. While this randomization plan may have reduced baseline comparability somewhat, it avoided extensive contamination of controls that would have been caused by physicians working in multiple hospitals within each city." |

| <b>Tu 2009 N=18,492</b>                                   |                           |                                                                                                                                                                     |
|-----------------------------------------------------------|---------------------------|---------------------------------------------------------------------------------------------------------------------------------------------------------------------|
| <b>Domain</b>                                             | <b>Authors' judgement</b> | <b>Support for judgement</b>                                                                                                                                        |
| Random sequence generation (selection bias)               | Low risk                  | Central randomization by study statistician.                                                                                                                        |
| Allocation concealment (selection bias)                   | Low risk                  | Method of allocation concealment not reported; however, randomization carried out ahead of study which limits risk of allocation concealment bias in cluster RCTs.  |
| Blinding of participants and personnel (performance bias) | High risk                 | Unblinded study.                                                                                                                                                    |
| Blinding of outcome assessment (detection bias)           | Low risk                  | Outcome assessors were unblinded; however, outcome measures were objective and not likely to be affected by unblinding of outcome assessors.                        |
| Incomplete outcome data (attrition bias)                  | Unclear risk              | Two clusters lost from the early feedback group and 3 clusters lost from the delayed feedback group. Data from the lost clusters were not included in the analysis. |
| Selective reporting (reporting bias)                      | High risk                 | Trial registration occurred in 2005 but the study began in 1999. NCT00187460                                                                                        |
| Other bias                                                | Unclear risk              | Recruitment bias: Consecutive patients reportedly recruited                                                                                                         |

| <b>Wu 2019 N=29,346</b>                                   |                           |                                                               |
|-----------------------------------------------------------|---------------------------|---------------------------------------------------------------|
| <b>Domain</b>                                             | <b>Authors' judgement</b> | <b>Support for judgement</b>                                  |
| Random sequence generation (selection bias)               | Low risk                  | Central randomization by study statistician.                  |
| Allocation concealment (selection bias)                   | Low risk                  | Allocation codes were concealed by a statistician separately. |
| Blinding of participants and personnel (performance bias) | High risk                 | Unblinded study.                                              |
| Blinding of outcome assessment (detection bias)           | Low risk                  | Outcome assessors were blinded                                |
| Incomplete outcome data (attrition bias)                  | Low risk                  |                                                               |
| Selective reporting (reporting bias)                      | High risk                 | Trial pre-registered prior on ClinicalTrials.gov. NCT01398228 |
| Other bias                                                | Low risk                  | None identified                                               |

**Data supplement 5. Detailed Summary of outcomes of randomized controlled trials including all outcomes**

| Outcome                              | Trial                        | Event Rates, No (%)                                                              |                                                                                  | Significance                                                               |                                           |
|--------------------------------------|------------------------------|----------------------------------------------------------------------------------|----------------------------------------------------------------------------------|----------------------------------------------------------------------------|-------------------------------------------|
|                                      |                              | Intervention                                                                     | Comparator                                                                       | Effect (95% CI)                                                            | p-value                                   |
| In-hospital MACE                     | Berwanger 2012 <sup>9</sup>  | 33 (5.5)                                                                         | 38 (7.0)                                                                         | OR: 0.72 (0.36, 1.43)                                                      | 0.35                                      |
|                                      | Du 2014 <sup>10</sup>        | 92 (5.8)                                                                         | 122 (6.4)                                                                        | RR: 1.12 (0.58, 2.14)                                                      | 0.74                                      |
|                                      | Guenancia 2016 <sup>12</sup> | 26 (9.1)                                                                         | 31 (10.8)                                                                        | OR: 1.59 (0.61, 4.17)                                                      | 0.49                                      |
|                                      | Wu 2019 <sup>20</sup>        | 559 (3.8)                                                                        | 655 (4.4)                                                                        | OR: 0.93 (0.75, 1.15)                                                      | NR                                        |
| In-hospital mortality                | Berwanger 2012 <sup>9</sup>  | 29 (4.8)                                                                         | 28 (5.1)                                                                         | OR: 0.82 (0.37, 1.82)                                                      | 0.62                                      |
|                                      | Du 2014 <sup>10</sup>        | 41 (2.6)                                                                         | 78 (4.1)                                                                         | RR: 1.60 (0.97, 2.64)                                                      | 0.07                                      |
|                                      | Guenancia 2016 <sup>12</sup> | 6 (2.1)                                                                          | 11 (3.8)                                                                         | OR: 1.16 (0.68, 2.01)                                                      | NR                                        |
|                                      | Huffman 2018 <sup>16</sup>   | 321 (2.8)                                                                        | 331 (3.3)                                                                        | aOR: 0.98 (0.82, 1.17)                                                     | NR                                        |
| Rates of reperfusion for STEMI       | Du 2014 <sup>10</sup>        | 290 (42.7)                                                                       | 229 (31.8)                                                                       | RR: 1.24 (0.98, 1.55)                                                      | 0.07                                      |
|                                      | Huffman 2018 <sup>16</sup>   | 4805 (71.0)                                                                      | 5067 (73.2)                                                                      | OR: 1.24 (1.06, 1.46)                                                      |                                           |
|                                      | Kinsman 2012 <sup>14</sup>   | Thrombolysis                                                                     | Thrombolysis                                                                     |                                                                            | I: 0.86                                   |
|                                      |                              | Baseline: 80%<br>Post-intervention: 78%                                          | Baseline: 96%<br>Post-intervention: 84%                                          |                                                                            | C: 0.19                                   |
|                                      | Lytle 2015 <sup>15</sup>     | 730 (97.2)                                                                       | 228 (94.2)                                                                       |                                                                            | 0.03                                      |
|                                      | Sauaia 2000 <sup>17</sup>    | Baseline: 12 (55)<br>Post-intervention: 9 (75)                                   | Baseline: 31 (84)<br>Post-intervention: 4 (44)                                   | Control 6.5x worse compared to baseline                                    | I: 0.01<br>C: 0.02                        |
|                                      |                              | Tu 2009 <sup>19</sup>                                                            | % change (95% CI):<br>6.7 (-0.8, 14.2)                                           | % change (95% CI):<br>7.2 (-0.5, 15.1)                                     | Absolute %difference:<br>3.3 (-5.7, 12.4) |
| Wu 2019 <sup>20</sup>                | 1414 (48.9)                  | 1683 (52.2)                                                                      | OR: -2.2 (-4.7, 0.3)                                                             | NR                                                                         |                                           |
| Rates of in-hospital medical therapy | Berner 2003 <sup>8</sup>     | ASA, % change: 20.2                                                              | *                                                                                | OR: 1.92 (1.19, 3.32)                                                      | < 0.01                                    |
|                                      |                              | AC, % change: 31                                                                 | AC, % change: 9.1                                                                | OR: 0.89 (0.58, 1.34)                                                      | NR                                        |
|                                      | Berwanger 2012 <sup>9</sup>  | ASA, n/N: 584/599 (97.5)                                                         | ASA, n/N: 520/543 (95.8)                                                         | OR: 1.73 (0.84, 3.56)                                                      | 0.14                                      |
|                                      |                              | AC, n/N: 509/587 (86.7)                                                          | AC, n/N: 433/535 (80.9)                                                          | OR: 1.34 (0.72, 2.49)                                                      | 0.36                                      |
|                                      | Flather 2012 <sup>11</sup>   | AC, n/N: 666/717 (92.9)                                                          | AC, n/N: 442/477 (93.7)                                                          | OR: 1.08 (0.59, 1.98)                                                      | 0.81                                      |
|                                      | Heller 2001 <sup>13</sup>    | ASA, change in management follow-up vs. baseline, OR (95% CI): 1.15 (0.87, 1.52) | ASA, change in management follow-up vs. baseline, OR (95% CI): 0.90 (0.64, 1.26) | Difference in management intervention vs. control<br>OR: 1.14 (0.74, 1.76) | 0.28                                      |

|                                    |                             |                                                                                 |                                                                                 |                                                                         |      |
|------------------------------------|-----------------------------|---------------------------------------------------------------------------------|---------------------------------------------------------------------------------|-------------------------------------------------------------------------|------|
|                                    |                             | AC, change in management follow-up vs. baseline, OR (95% CI): 0.67 (0.22, 2.01) | AC, change in management follow-up vs. baseline, OR (95% CI): 1.61 (1.08, 2.39) | Difference in management intervention vs. control OR: 0.54 (0.25, 1.18) | 0.13 |
|                                    |                             | BB, change in management follow-up vs. baseline, OR (95% CI): 1.57 (1.13, 2.20) | BB, change in management follow-up vs. baseline, OR (95% CI): 1.11 (0.89, 1.38) | Difference in management intervention vs. control OR: 1.33 (0.90, 1.97) | 0.07 |
|                                    | Huffman 2018 <sup>16</sup>  | ASA, n/N: 11027/11286 (97.7)                                                    | ASA, n/N: 9858/10042 (98.2)                                                     | OR: 0.98 (0.69, 1.39)                                                   |      |
|                                    |                             | AC, n/N: 9654/11281 (85.6)                                                      | AC, n/N: 8602/10051 (85.6)                                                      | OR: 1.27 (1.09, 1.49)                                                   |      |
|                                    |                             | BB, n/N: 4638/10885 (42.6)                                                      | BB, n/N: 3676/9874 (37.2)                                                       | OR: 1.46 (1.29, 1.65)                                                   |      |
|                                    | Sauaia 2000 <sup>17</sup>   | ASA, n:<br>Baseline: 188 (90)<br>Post-intervention: 89 (95)                     | ASA, n:<br>Baseline: 208 (93)<br>Post-intervention: 88 (98)                     |                                                                         | NR   |
|                                    |                             | AC, n/N: 919/1020 (90)                                                          | AC, n/N: 765/850 (90)                                                           |                                                                         | 0.94 |
|                                    | Tu 2009 <sup>19</sup>       | ASA, absolute % change (95% CI): 6.7 (3.7, 9.6)                                 | ASA, absolute % change (95% CI): 4.3 (0.2, 8.3)                                 | Absolute % difference: 4.3 (-0.1, 8.8)                                  | 0.06 |
|                                    |                             | BB, absolute % change (95% CI): 45.4 (38.8, 51.9)                               | BB, absolute % change (95% CI): 39.1 (31.3, 46.8)                               | Absolute % difference: 3.1 (-5.8, 12.1)                                 | 0.49 |
|                                    | Wu 2019 <sup>20</sup>       | ASA, n/N: 13334/14537 (91.7)                                                    | ASA, n/N: 13241/14809 (89.4)                                                    | OR: 1.01 (0.80, 1.28)                                                   | NR   |
|                                    |                             | DAPT, n/N: 10725/14537 (73.8)                                                   | DAPT, n/N: 8680/14809 (58.6)                                                    | OR: 1.21 (1.02, 1.44)                                                   | NR   |
|                                    |                             | Statin, n/N: 12501/4537 (86.0)                                                  | Statin, n/N: 12,479/14809 (84.3)                                                | OR: 1.04 (0.87, 1.24)                                                   | NR   |
| Rates of discharge medical therapy | Bailey 2007 <sup>7</sup>    | ASA, n/N: 352/365 (96.4)                                                        | ASA, n/N: 471/488 (96.5)                                                        |                                                                         | 0.95 |
|                                    |                             | BB, n/N: 350/365 (95.9)                                                         | BB, n/N: 448/488 (91.8)                                                         |                                                                         | 0.08 |
|                                    |                             | ACE-i/ARB, n/N: 328/365 (89.9)                                                  | ACE-i/ARB n/N: 409/488 (83.8)                                                   |                                                                         | 0.01 |
|                                    |                             | Statin, n/N: 344/365 (94.2)                                                     | Statin, n/N: 436/488 (89.3)                                                     |                                                                         | 0.01 |
|                                    | Berner 2003 <sup>8</sup>    | ASA, % change: 5.2%                                                             | ASA, % change: *                                                                | OR: 1.29 (0.79, 2.09)                                                   | NR   |
|                                    |                             | BB, % change: 4.0%                                                              | BB, % change: *                                                                 | OR: 0.85 (0.50, 1.43)                                                   | NR   |
|                                    | Berwanger 2012 <sup>9</sup> | ASA, n/N: 556/576 (96.5)                                                        | ASA, n/N: 493/531 (92.8)                                                        | OR: 2.08 (0.83, 5.24)                                                   | 0.12 |

|                             |                                                                      |                                                                     |                                        |       |
|-----------------------------|----------------------------------------------------------------------|---------------------------------------------------------------------|----------------------------------------|-------|
|                             | BB, n/N: 451/525 (85.9)                                              | BB, n/N: 425/520 (81.7)                                             | OR: 1.35 (0.64, 2.81)                  | 0.43  |
|                             | ACE-i/ARB, n/N: 415/509 (81.5)                                       | ACE-i/ARB, n/N: 383/503 (76.1)                                      | OR: 1.21 (0.58, 2.51)                  | 0.61  |
|                             | Statin, n/N: 508/577 (88)                                            | Statin, n/N: 461/536 (86.0)                                         | OR: 1.87 (0.81, 4.30)                  | 0.14  |
| Du 2014 <sup>10</sup>       | Recommended therapies, n/N: 976/1555 (62.7)                          | Recommended therapies, n/N: 932/1822 (51.2)                         | RR: 1.23 (1.06, 1.42)                  | 0.011 |
| Flather 2012 <sup>11</sup>  | BB, n/N (%): 188/213 (88.3)                                          | BB n/N (%): 110/124 (88.7)                                          | OR: 1.23 (0.49, 3.13)                  | 0.66  |
|                             | ACE-i/ARB, n/N: 467/540 (86.5)                                       | ACE-i/ARB, n/N: 290/352 (82.4)                                      | OR: 1.29 (0.76, 2.18)                  | 0.34  |
|                             | Statin, n/N: 674/707 (95.3)                                          | Statin, n/N: 445/471 (94.5)                                         | OR: 1.46 (0.72, 2.99)                  | 0.30  |
| Huffman 2018 <sup>16</sup>  | ASA, n/N: 10360/10559 (98.1)                                         | ASA, n/N: 8777/8998 (97.5)                                          | OR: 1.65 (1.15, 2.37)                  | NR    |
|                             | BB, n/N: 6799/10178 (66.8)                                           | BB, n/N: 5808/8894 (65.3)                                           | OR: 1.48 (1.30, 1.68)                  | NR    |
|                             | ACE-i/ARB, n/N: 643/1495 (43.0)                                      | ACE-i/ARB, n/N: 534/1029 (51.9)                                     | OR: 1.45 (1.03, 2.04)                  | NR    |
|                             | Statin, n/N: 10289/1057 (97.3)                                       | Statin n/N: 8700/9006 (96.6)                                        | OR: 1.42 (1.04, 1.92)                  | NR    |
| Lytle 2015 <sup>15</sup>    | ASA, (%): 97.0                                                       | ASA, (%): 97.8                                                      |                                        | 0.62  |
|                             | ACE-i/ARB (%): 75.5                                                  | ACE-i/ARB, (%): 89.0                                                |                                        | 0.01  |
|                             | Statin, (%): 97.9                                                    | Statin, (%): 96.5                                                   |                                        | 0.51  |
| Sauaia 2000 <sup>17</sup>   | ASA, n (%):<br>Baseline: 103 (83)<br>Post-intervention: 57 (88)      | ASA, n (%):<br>Baseline: 129 (87)<br>Post-intervention: 63 (86)     |                                        | NR    |
|                             | BB, n (%):<br>Baseline: 16 (46)<br>Post-intervention: 15 (54)        | BB, n (%):<br>Baseline: 32 (65)<br>Post-intervention: 9 (75)        |                                        | NR    |
|                             | ACE-i/ARB, n (%):<br>Baseline: 16 (57)<br>Post-intervention: 14 (82) | ACE-i/ARB, n (%):<br>Baseline: 21 (75)<br>Post-intervention: 9 (82) |                                        | NR    |
| Soumerai 1998 <sup>18</sup> | ASA, median % change from baseline: 17%                              | ASA, median % change from baseline: -4%                             |                                        | 0.04  |
|                             | BB, median % change from baseline: 63%                               | BB, median % change from baseline: 30%                              |                                        | 0.02  |
| Tu 2009 <sup>19</sup>       | ASA, absolute % change (95% CI): -0.6 (-4.0, 2.7)                    | ASA, absolute % change (95% CI): -1.5 (-6.5, 3.4)                   | Absolute % difference: 0.9 (-4.7, 6.6) | 0.75  |



|                                        |                             |                                                                                     |                                                                                   |                                          |                    |
|----------------------------------------|-----------------------------|-------------------------------------------------------------------------------------|-----------------------------------------------------------------------------------|------------------------------------------|--------------------|
|                                        |                             | BB, absolute % change (95% CI): 8.2 (5.4, 11.1)                                     | BB, absolute % change (95% CI): 7.6 (4.1, 11.2)                                   | Absolute % difference: 0.6 (-3.2, 4.3)   | 0.75               |
|                                        |                             | ACE-i/ARB, absolute % change (95% CI): 6.7 (1.0, 12.4)                              | ACE-i/ARB, absolute % change (95% CI): 5.4 (-0.8, 11.5)                           | Absolute % difference: 2.8 (-5.2, 10.8)  | 0.48               |
|                                        | Wu 2019 <sup>20</sup>       | ASA, n/N: 11975/14537 (85.5)                                                        | ASA, n/N: 11565/14809 (81.5)                                                      | OR: 1.48 (1.14, 1.93)                    | NR                 |
|                                        |                             | BB, n/N: 8358/14537 (59.7)                                                          | BB, n/N: 7458/14809 (52.5)                                                        | OR: 1.36 (1.17, 1.59)                    | NR                 |
|                                        |                             | Statin, n/N: 11532 (82.3)                                                           | Statin, n/N: 11166 (78.7)                                                         | OR: 1.33 (1.06, 1.67)                    | NR                 |
|                                        |                             | ACE-i/ARB, n (%): 1382 (50.6)                                                       | ACE-i/ARB, n (%): 1295 (47.9)                                                     | OR: 1.27 (1.05, 1.53)                    | NR                 |
| Door to ECG time                       | Kinsman 2012 <sup>14</sup>  | Mean door to ECG time min (SD) baseline 6.4 (7.2) vs. post-intervention 11.4 (17.1) | Mean door to ECG time min (SD) baseline 7.0 (8.4) vs. post-intervention 7.4 (4.9) |                                          | I: 0.21<br>C: 0.82 |
|                                        | Wu 2019 <sup>20</sup>       | done in time, n (%): 9020 (62.0)                                                    | done in time, n (%): 7768 (52.5)                                                  | OR: 1.12 (0.90, 1.39)                    | NR                 |
| Door to any reperfusion time for STEMI | Du 2014 <sup>10</sup>       | DTB, min (ICC=0.144): 141.09 (103.69)                                               | DTB, min (ICC=0.144): 130.09 (90.98)                                              | Mean difference: -10.6 (-44.4, 23.21)    |                    |
|                                        | Huffman 2018 <sup>16</sup>  | DTB, median (IQR), min: 77 (55-118)                                                 | DTB, median (IQR), min: 65 (53-105)                                               | $\beta$ coefficient: 13.00 (3.64, 22.36) |                    |
|                                        | Kinsman 2012 <sup>14</sup>  | Mean DTN, min (SD): Baseline: 46.6 (37.7)<br>Post-intervention: 47.2 (40.5)         | Mean DTN, min (SD): Baseline: 43.8 (33.6)<br>Post-intervention: 35.9 (29.6)       |                                          | I: 0.96<br>C: 0.40 |
|                                        | Lytle 2015 <sup>15</sup>    | DTB < 90 min, n: 234 (94.0)                                                         | DTB < 90 min, n: 332 (92.0)                                                       | Mean difference: -10.6 (-44.4, 23.21)    | 0.35               |
|                                        | Wu 2019 <sup>20</sup>       | Under 90 minutes, n (%): 539 (37.4)                                                 | Under 90 minutes, n (%): 516 (30.0)                                               | OR: 1.12 (0.77, 1.62)                    | NR                 |
| 30-day total mortality                 | Berwanger 2012 <sup>9</sup> | 42 (7.0)                                                                            | 46 (8.4)                                                                          | OR: 0.79 (0.46, 1.34)                    | 0.38               |
|                                        | Huffman 2018 <sup>16</sup>  | 445 (3.9)                                                                           | 509 (5.1)                                                                         | aOR: 0.87 (0.75, 1.00)                   |                    |
|                                        | Sauaia 2000 <sup>17</sup>   | Baseline: 81 (19)<br>Post-intervention: 33 (15)                                     | Baseline: 85 (17)<br>Post-intervention: 46 (22)                                   |                                          | NR                 |
|                                        | Tu 2009 <sup>19</sup>       | Absolute % change (95% CI): -1.9 (-3.8, -0.1)                                       | Absolute % change (95% CI): 0 (-2.3, 2.3)                                         | Absolute % difference: -2.5 (-4.9, -0.1) | 0.045              |
| 30-day MACE                            | Berwanger 2012 <sup>9</sup> | 49 (8.1)                                                                            | 55 (10.1)                                                                         | OR: 0.76 (0.45, 1.27)                    | 0.30               |
|                                        | Huffman 2018 <sup>16</sup>  | 445 (3.9)                                                                           | 645 (6.4)                                                                         | OR: 0.92 (0.81, 1.04)                    | NR                 |

---

CI: confidence interval, ACE-I: angiotensin converting enzyme inhibitor, ARB: angiotensin receptor blocker, BB: beta-blocker, ASA: Aspirin, AC: anticoagulation, DTB: door to balloon time, DTN: door to needle time, ECG: electrocardiogram, STEMI: ST-elevation myocardial infarction, MACE: major adverse cardiovascular events, TP: total participants. \* Values not provided in manuscript. NS: not significant, aOR: adjusted odds ratio. NR: not reported. QI: quality improvement, 1<sup>o</sup>: primary, 2<sup>o</sup>: secondary

---

**Data Supplement 6. Summary of outcomes of controlled pre-post studies.**

| <b>Outcome</b>                       | <b>Trials</b>                | <b>Intervention</b>                                   |                                                  | <b>Control</b>                                        |                                                  | <b>Significance</b>                   |
|--------------------------------------|------------------------------|-------------------------------------------------------|--------------------------------------------------|-------------------------------------------------------|--------------------------------------------------|---------------------------------------|
| In-hospital mortality                | Scott 2001 <sup>37</sup>     | <b>Baseline</b><br>Absolute rate:<br>12.3%            | <b>Post</b><br>Absolute rate:<br>8.8%            | <b>Baseline</b><br>Absolute rate:<br>13.4%            | <b>Post</b><br>Absolute rate: 12.8%              | OR:<br>0.59 (0.45,<br>0.78)<br>P=0.03 |
|                                      | Carlhead 2006 <sup>23</sup>  | <b>Baseline</b><br>14.2(events/100<br>patient years)  | <b>Post</b><br>11.4(events/100<br>patient years) | <b>Baseline</b><br>14.2(events/100<br>patient years)  | <b>Post</b><br>14.2(events/100<br>patient years) |                                       |
| Rates of reperfusion for STEMI       | Ellerbeck 2000 <sup>27</sup> | <b>Baseline</b><br>Absolute rate: 17%                 | <b>Post</b><br>Absolute rate: 18%                | <b>Baseline</b><br>Absolute rate: 17%                 | <b>Post</b><br>Absolute rate: 20%                | NR                                    |
| Rates of in-hospital medical therapy | Carlhead 2006 <sup>23</sup>  | <b>Baseline</b><br>AC% (SD):66.2<br>(14.1)            | <b>Post</b><br>AC% (SD): 82.5<br>(7.9)           | <b>Baseline</b><br>AC% (SD): 65.5<br>(16.2)           | <b>Post</b><br>AC% (SD): 70.8<br>(11.9)          | P=0.01                                |
|                                      | Carlhead 2009 <sup>24</sup>  | AC% (range): 69.2<br>(63.9-73.2)                      | AC% (range): 77.3<br>(71.2-84.9)                 | AC% (range): 67.3<br>(53.8-76.5)                      | AC% (range): 72.8<br>(63.5-79.5)                 | P=0.38                                |
|                                      | Ellerbeck 2000 <sup>27</sup> | ASA%: 70                                              | ASA%: 83                                         | ASA %: 71                                             | ASA %: 81                                        | P< 0.05                               |
| Rates of discharge medical therapy   | Carlhead 2006 <sup>23</sup>  | <b>Baseline</b><br>Clopidogrel %<br>(SD): 32.2 (17.4) | <b>Post</b><br>Clopidogrel % (SD):<br>73.4 (7.2) | <b>Baseline</b><br>Clopidogrel % (SD):<br>28.0 (20.4) | <b>Post</b><br>Clopidogrel % (SD):<br>54.3[23.7] | P=0.01                                |
|                                      |                              | ACE-i/ARB % (SD):<br>62.8 (9.8)                       | ACE-i/ARB % (SD):<br>75.5 (9.8)                  | ACE-i/ARB % (SD):<br>61.9 (10.0)                      | ACE-i/ARB % (SD):<br>63.2 (9.2)                  | P=0.002                               |
|                                      |                              | Statin % (SD): 84.7<br>(9.1)                          | Statin % (SD): 91.9<br>(5.0)                     | Statin % (SD): 82.3<br>(7.9)                          | Statin % (SD): 83.1<br>(9.7)                     | P=0.065                               |
|                                      | Carlhead 2009 <sup>24</sup>  | ASA % (range):<br>84.3 (81.1-86.6)                    | ASA % (range):<br>87.6 (84-90)                   | ASA % (range):<br>82.9 (76.3-87.1)                    | ASA % (range):<br>83.5 (81.6-87.4)               | P=0.78                                |
|                                      |                              | BB % (range): 84.3<br>(75.7-90.9)                     | BB % (range): 87.4<br>(84.3-90.3)                | BB % (range): 86.2<br>(80.8-89.1)                     | BB % (range): 85.4<br>(81.5-90.1)                | P=0.34                                |

|                                             |                                 |                                                                    |                                      |                                                                    |                                       |                 |
|---------------------------------------------|---------------------------------|--------------------------------------------------------------------|--------------------------------------|--------------------------------------------------------------------|---------------------------------------|-----------------|
|                                             |                                 | ACE-I %(range):<br>48.7 (40.1-55.0)                                | ACE-i % (range):<br>61.0 (52.1-73.3) | ACE-i % (range):<br>48.6 (43.2-52.8)                               | ACE-i % (range):<br>48.0 (43.3-53.7)  | P=0.0005        |
|                                             |                                 | Statin% (range):<br>71.6 (61.3-78.1)                               | Statin% (range):<br>81.5 (75.6-87.9) | Statin% (range):<br>67.8 (60.6-73.7)                               | Statin % (range):<br>72.9 (66.0-79.3) | P=0.035         |
|                                             | Ellerbeck<br>2000 <sup>27</sup> | ASA %: 61                                                          | ASA %: 77                            | ASA %: 69                                                          | ASA %: 75                             | P< 0.05         |
|                                             |                                 | BB%: 34                                                            | BB%: 55                              | BB%: 34                                                            | BB%: 49                               | P< 0.05         |
|                                             |                                 | ACE-i/ARB %:36                                                     | ACE-i/ARB %: 53                      | ACE-i/ARB %: 55                                                    | ACE-i/ARB %: 62                       | P= NR           |
| Door to<br>ECG time                         | Chen<br>2011 <sup>25</sup>      | Median (IQR), min: 6 (2-8)                                         |                                      | Median (IQR), min: 9 (5-11)                                        |                                       | P=0.00          |
| Door to<br>reperfusion<br>time for<br>STEMI | Chen<br>2011 <sup>25</sup>      | DTB median (IQR), min: 86 (75-95)                                  |                                      | DTB median (IQR), min: 125 (90-127)                                |                                       | P<0.0001        |
| 1-year total<br>mortality                   | Carlhead<br>2009 <sup>24</sup>  | Event: % (SD):<br>12.2 (4.5)                                       | Event: % (SD): 11.4<br>(3.6)         | Event: % (SD): 14.2<br>(4.2)                                       | Event % (SD): 14.2<br>(4.5)           | P=0.03,<br>P=NR |
| Health<br>related<br>quality of<br>life     | Fakhr<br>2015 <sup>28</sup>     | Pre-post difference in anxiety scores<br>mean (SD): 0.52 (1.36)    |                                      | Pre-post difference in anxiety scores mean<br>(SD): -0.17 (1.69)   |                                       | P=0.009         |
|                                             |                                 | Pre-post difference in depression scores<br>mean (SD): 0.75 (2.05) |                                      | Pre-post difference in depression scores<br>mean (SD): 0.00 (1.83) |                                       | P=0.024         |
|                                             |                                 | Overall Patient satisfaction score mean<br>(SD): 3.69 (0.39)       |                                      | Overall patient satisfaction score mean<br>(SD): 3.45 (0.47)       |                                       | P=0.002         |

Abbreviations: CI: confidence interval, ACE-I: angiotensin converting enzyme inhibitor, ARB: angiotensin receptor blocker, BB: beta-blocker, ASA: Aspirin, AC: anticoagulation, DTB: door to balloon time, DTN: door to needle time, ECG: electrocardiogram, STEMI: ST-elevation myocardial infarction, MACE: major adverse cardiovascular events, NS: p-value reported as not significant. NR: not reported

### Data Supplement 7. Summary of outcomes of pre-post studies

| Outcome                              | Trials                         | Pre-intervention                    | Post-intervention                   | Significance |
|--------------------------------------|--------------------------------|-------------------------------------|-------------------------------------|--------------|
| In-hospital mortality                | Alexander 2017 <sup>21</sup>   | Absolute event rate n (%): 52 (5.8) | Absolute event rate n (%): 85 (5.6) | P=0.83       |
|                                      | Khot 2007 <sup>31</sup>        | Absolute event rate n (%): 5 (7.4)  | Absolute event rate n (%): 5 (5.2)  | P=0.74       |
|                                      | Scholz 2017 <sup>34</sup>      | Absolute event rate: 11.1%          | Absolute event rate: 9%             | P=0.28       |
|                                      | Scott 2000 <sup>36</sup>       | Absolute event rate: 15.8%          | Absolute event rate: 8.6%           | P=0.02       |
|                                      | Scott 2001 <sup>37</sup>       | Absolute event rate: 16.7%          | Absolute event rate: 4.0%           | P< 0.05      |
|                                      | Scott 2004 <sup>38</sup>       | Absolute event rate: 7.4%           | Absolute event rate: 5.9%           | P=0.39       |
| Rates of reperfusion for STEMI       | Alexander 2017 <sup>21</sup>   | No (%): 795 (88.5)                  | No (%): 1372 (90.1)                 | P=0.21       |
|                                      | Scott 2000 <sup>36</sup>       | No (%): 133 (100)                   | No (%): 245 (100)                   | P=NR         |
|                                      | Scott 2001 <sup>37</sup>       | No (%): 60 (100)                    | No (%): 40 (94)                     | P=NR         |
|                                      | Scott 2004 <sup>38</sup>       | No (%): 49 (100)                    | No (%): 39 (100)                    | P=NR         |
| Rates of in-hospital medical therapy | Aziz 2012 <sup>22</sup>        | Antiplatelet: 50%                   | Antiplatelet: 75%                   | P=0.007      |
|                                      |                                | BB: 45%                             | BB: 54%                             | P=0.19       |
|                                      |                                | ACE-i/ARB: 32%                      | ACE-i/ARB: 54%                      | P< 0.0001    |
|                                      |                                | Statin: 35%                         | Statin: 62%                         | P< 0.001     |
|                                      | Prabhakaran 2008 <sup>33</sup> | ASA: 89.7%                          | ASA: 96.8%                          | P< 0.05      |
|                                      |                                | AC: 57.6%                           | AC: 66.3%                           | P< 0.05      |
|                                      |                                | BB: 48.6%                           | BB: 63.4%                           | P< 0.05      |

|                                    |                              |                             |                             |           |
|------------------------------------|------------------------------|-----------------------------|-----------------------------|-----------|
|                                    |                              | ACE-i: 36.4%                | ACE-i: 38.8%                | P= NR     |
|                                    |                              | Statin: 74.1%               | Statin: 86.3%               | P< 0.05   |
| Rates of discharge medical therapy | Aziz 2012 <sup>22</sup>      | Antiplatelet: 34%           | Antiplatelet: 91%           | P< 0.0001 |
|                                    |                              | BB: 30%                     | BB: 61%                     | P< 0.0001 |
|                                    |                              | ACE-i/ARB: 32%              | ACE-i/ARB: 68%              | P< 0.0001 |
|                                    |                              | Statin: 37%                 | Statin: 70%                 | P< 0.0001 |
|                                    | Fonarow 2003 <sup>30</sup>   | ASA: 78%                    | ASA: 92%                    | P<0.01    |
|                                    |                              | BB: 12%                     | BB: 61%                     | P<0.01    |
|                                    |                              | ACE-i/ARB: 4%               | ACE-i/ARB: 56%              | P<0.01    |
|                                    |                              | Statin: 6%                  | Statin: 86%                 | P<0.001   |
|                                    | Scott 2001 <sup>37</sup>     | ASA: 76%                    | ASA: 83%                    | P=NS      |
|                                    |                              | BB: 60%                     | BB: 73%                     | P< 0.05   |
|                                    |                              | ACE-i/ARB: 44%              | ACE-i/ARB: 59%              | P< 0.05   |
|                                    | Scott 2004 <sup>38</sup>     | ASA: 89%                    | ASA: 90                     | P=0.82    |
|                                    |                              | BB: 76%                     | BB: 77%                     | P=0.52    |
|                                    |                              | ACE-i/ARB: 60%              | ACE-i/ARB: 70%              | P=0.002   |
| Statin: 68%                        |                              | Statin: 77%                 | P=0.005                     |           |
| Door to ECG time                   | Alexander 2017 <sup>21</sup> | median (IQR), min: 7 (5-13) | median (IQR), min: 5 (5-10) | P=0.02    |

|                                    |                                |                                                                           |                                                                           |                           |                                      |
|------------------------------------|--------------------------------|---------------------------------------------------------------------------|---------------------------------------------------------------------------|---------------------------|--------------------------------------|
|                                    | Khot 2007 <sup>31</sup>        | median (25 <sup>th</sup> ,75 <sup>th</sup> percentile range), min: 5(1,9) | median (25 <sup>th</sup> ,75 <sup>th</sup> percentile range), min: 4(1,6) | P=0.239                   |                                      |
|                                    | Scott 2004 <sup>38</sup>       | ECG within 10 min of arrival n/N (%): 145/238 (61)                        | ECG within 10 min of arrival n/N (%): 170/243 (70)                        | P=0.04                    |                                      |
| Door to reperfusion time for STEMI | Alexander 2017 <sup>21</sup>   | DTB median (IQR), min: 100 (84-143)                                       | DTB median (IQR), min: 105 (80-145)                                       | P=0.56                    |                                      |
|                                    | Dai 2016 <sup>26</sup>         | Symptom to balloon mean (SD), min: 136 (117)                              | Symptom to balloon mean (SD): 483 (504)                                   | P=0.004                   |                                      |
|                                    | Khot 2007 <sup>31</sup>        | < 60min DTB time: 8.3%                                                    | < 60 min DTB time: 19.8%                                                  | P<0.0001                  |                                      |
|                                    | Prabhakaran 2008 <sup>33</sup> | DTN median time: 33.3 min                                                 | DNT median time 22.3 min                                                  | P<0.05                    |                                      |
|                                    | Scholz 2017 <sup>34</sup>      | Time to thrombolysis median time: 193 min                                 | Time to thrombolysis median time: 139                                     | P<0.05                    |                                      |
|                                    | Scott 2001 <sup>37</sup>       | < 90 min DTB time: 65%                                                    | < 90 min DTB time: 82%                                                    | P<0.05                    |                                      |
|                                    | Scott 2004 <sup>38</sup>       | < 1hr thrombolysis: 33%                                                   | <1hr thrombolysis: 57%                                                    | P< 0.05                   |                                      |
|                                    |                                | Door to thrombolysis within 30 min (%): 35%                               | Door to thrombolysis within 30 min (%): 41                                | P=0.59                    |                                      |
|                                    | 30-day mortality               | Scholz 2017 <sup>34</sup>                                                 | Absolute event rate: 12.3%                                                | Absolute event rate: 9.9% | P= 0.15                              |
|                                    | 1-year total mortality         | Aziz 2012 <sup>22</sup>                                                   | Absolute event rate: 5%                                                   | Absolute event rate: 1%   | HR (95% CI):0.42(0.19-0.84),p: 0.015 |
| Fonarow 2003 <sup>30</sup>         |                                | Absolute event rate: 7.0%                                                 | Absolute event rate: 3.3%                                                 | P< 0.05                   |                                      |
| Scholz 2017 <sup>34</sup>          |                                | Absolute event rate: 14.9%                                                | Absolute event rate: 12.5%                                                | P< 0.05                   |                                      |

CI: confidence interval, ACE-I: angiotensin converting enzyme inhibitor, ARB: angiotensin receptor blocker, BB: beta-blocker, ASA: Aspirin, AC: anticoagulation, DTB: door to balloon time, DTN: door to needle time, ECG: electrocardiogram, STEMI: ST-elevation myocardial infarction, MACE: major adverse cardiovascular events, TP: total participants.

### Data Supplement 8. Summary of finding of controlled and non-controlled pre-post studies

| Hospital-based acute myocardial infarction quality improvement interventions vs. usual care |                                                                                                                                                                                                                                                       |                            |                                      |                                                                                                                |
|---------------------------------------------------------------------------------------------|-------------------------------------------------------------------------------------------------------------------------------------------------------------------------------------------------------------------------------------------------------|----------------------------|--------------------------------------|----------------------------------------------------------------------------------------------------------------|
| Outcomes                                                                                    | Effect on outcome                                                                                                                                                                                                                                     | studies/total participants | Quality of the evidence              | Comments                                                                                                       |
| In-hospital mortality                                                                       | An absolute event rate reduction ranging from 0.2%-13.0% post intervention in seven studies. <sup>21, 23, 31, 34, 36, 37, 38</sup>                                                                                                                    | 7 studies<br>TP: 42,013    | ⊕○○○<br>VERY<br>LOW <sup>*,†,‡</sup> | Downgraded due to study limitations <sup>*</sup> , inconsistency <sup>†</sup> , and imprecision <sup>‡</sup> . |
| Rates of reperfusion for STEMI                                                              | All five studies showed no significant change in rates of reperfusion post-intervention. <sup>21, 27, 36, 37, 38</sup>                                                                                                                                | 5 studies<br>TP: 28,196    | ⊕○○○<br>VERY<br>LOW <sup>*,†,‡</sup> | Downgraded due to study limitations <sup>*</sup> , inconsistency <sup>2</sup> , and imprecision <sup>3</sup> . |
| Rates of in-hospital medical therapy                                                        | <b><i>In-hospital medical therapy</i></b><br>The effect estimates were 2.6%-25% higher in rates of in-hospital medical therapy post-intervention. <sup>22, 23, 24, 27, 33</sup>                                                                       | 5 studies<br>TP: 21,722    | ⊕○○○<br>VERY<br>LOW <sup>*,†,‡</sup> | Downgraded due to study limitations <sup>*</sup> , inconsistency <sup>†</sup> , and imprecision <sup>‡</sup> . |
|                                                                                             | <b><i>Discharge medical therapy</i></b><br>The effect estimates were 2%-80% higher in rates of discharge medical therapy post-intervention. <sup>22, 23, 24, 27, 30, 33, 37, 38</sup>                                                                 | 7 studies<br>TP: 22,539    | ⊕○○○<br>VERY<br>LOW <sup>*,†,‡</sup> | Downgraded due to study limitations <sup>*</sup> , inconsistency <sup>†</sup> , and imprecision <sup>‡</sup> . |
| Door to ECG time                                                                            | Three studies showed a statistically significant reduction in door to ECG time associated with the intervention while one study showed no difference. <sup>21, 25, 31, 38</sup>                                                                       | 4 studies<br>TP: 5,058     | ⊕○○○<br>VERY<br>LOW <sup>*,†,‡</sup> | Downgraded due to study limitations <sup>*</sup> , inconsistency <sup>†</sup> , and imprecision <sup>‡</sup> . |
| Door to any reperfusion for STEMI time                                                      | Six of the seven studies showed a reduction in door to reperfusion time or an increase in rates of reperfusion <1hr in the intervention achieving statistical significance. One study showed no difference. <sup>21, 25, 26, 31, 33, 34, 37, 38</sup> | 7 studies<br>TP: 6,176     | ⊕○○○<br>VERY<br>LOW <sup>*,†,‡</sup> | Downgraded due to study limitations <sup>*</sup> , inconsistency <sup>†</sup> , and imprecision <sup>‡</sup> . |



|                                                                                                                                                                                                                                                                                                                                                                                                                                                                                                                                                                                                                                                                                                                                                                                                                                        |                                                                                                                                                                 |                         |                                      |                                                                                                   |
|----------------------------------------------------------------------------------------------------------------------------------------------------------------------------------------------------------------------------------------------------------------------------------------------------------------------------------------------------------------------------------------------------------------------------------------------------------------------------------------------------------------------------------------------------------------------------------------------------------------------------------------------------------------------------------------------------------------------------------------------------------------------------------------------------------------------------------------|-----------------------------------------------------------------------------------------------------------------------------------------------------------------|-------------------------|--------------------------------------|---------------------------------------------------------------------------------------------------|
| 30-day MACE                                                                                                                                                                                                                                                                                                                                                                                                                                                                                                                                                                                                                                                                                                                                                                                                                            | One study showed an overall total mortality rate reduction by 2.4% post-intervention that was not statistically significant. <sup>34</sup>                      | 1 study<br>TP: 420      | ⊕○○○<br>VERY<br>LOW <sup>*,†,‡</sup> | Downgraded due to study limitations*, inconsistency <sup>†</sup> , and imprecision <sup>‡</sup> . |
| 1-year MACE                                                                                                                                                                                                                                                                                                                                                                                                                                                                                                                                                                                                                                                                                                                                                                                                                            | The effect estimates were 2.4%-4% lower rates of 1-year MACE post intervention with three studies achieving statistical significance. <sup>22, 24, 30, 34</sup> | 4 studies<br>TP: 14,842 | ⊕○○○<br>VERY<br>LOW <sup>*,†,‡</sup> | Downgraded due to study limitations*, inconsistency <sup>†</sup> , and imprecision <sup>‡</sup> . |
| <p>*Downgraded due to study limitations. †Downgraded due to inconsistency. ‡Downgraded due to imprecision</p> <p>GRADE Working Group grades of evidence.<sup>6</sup> <b>High quality:</b> We are very confident that the true effect lies close to that of the estimate of the effect. <b>Moderate quality:</b> We are moderately confident in the effect estimate: The true effect is likely to be close to the estimate of the effect, but there is a possibility that it is substantially different. <b>Low quality:</b> Our confidence in the effect estimate is limited: The true effect may be substantially different from the estimate of the effect. <b>Very low quality:</b> We have very little confidence in the effect estimate: The true effect is likely to be substantially different from the estimate of effect.</p> |                                                                                                                                                                 |                         |                                      |                                                                                                   |

## References;

1. Benjamin EJ, Virani SS, Callaway CW, Chamberlain AM, Chang AR, Cheng S, Chiuve SE, Cushman M, Delling FN, Deo R, de Ferranti SD, Ferguson JF, Fornage M, Gillespie C, Isasi CR, Jimenez MC, Jordan LC, Judd SE, Lackland D, Lichtman JH, Lisabeth L, Liu S, Longenecker CT, Lutsey PL, Mackey JS, Matchar DB, Matsushita K, Mussolino ME, Nasir K, Flaherty M, Palaniappan LP, Pandey A, Pandey DK, Reeves MJ, Ritchey MD, Rodriguez CJ, Roth GA, Rosamond WD, Sampson UKA, Satou GM, Shah SH, Spartano NL, Tirschwell DL, Tsao CW, Voeks JH, Willey JZ, Wilkins JT, Wu JHY, Alger HM, Wong SS, Muntner P. Heart Disease and Stroke Statistics, 2018 Update: A Report From the American Heart Association. *Circulation*. 2018;137(12):1-426.
2. Masoudi FA, Ponirakis AP, De Lemos JA, Jollis JG, Kremers M, Messenger JC, Moore JW, Moussa I, Oetgen WJ, Varosy PD, Vincent RN, Wei J, Curtis JP, Roe MT, Spertus JA. Trends in U.S. cardiovascular care: 2016 Report from 4 ACC National Cardiovascular Data Registries. *J Am Coll Cardiol*. 2017;69(11):1427-1450.
3. Vedanthan R, Seligman B, Fuster V. Global perspective on acute coronary syndrome: a burden on the young and poor. *Circ Res*. 2014;114:1959-1975.
4. PROSPERO International Prospective Register of Systematic Reviews. Hospital-based quality improvement interventions for patients with acute coronary syndrome: a systematic review. CRD42016047604. Available at: [www.crd.york.ac.uk/PROSPERO/DisplayPDF.php?ID=CRD42016047604](http://www.crd.york.ac.uk/PROSPERO/DisplayPDF.php?ID=CRD42016047604). Accessed on November 23 2018.
5. World Bank Country and Lending Groups. Available at: <https://datahelpdesk.worldbank.org/knowledgebase/articles/906519-world-bank-country-and-lending-groups>. Accessed on June 24 2018.
6. Guyatt GH, Oxman AD, Vist GE, Kunz R, Falck-Ytter Y, Alonso-Coello P, Schunemann HJ, GRADE Working Group. GRADE: an emerging consensus on rating quality of evidence and strength of recommendations. *BMJ*. 2008;336:924-6.
7. Bailey TC, Noiro LA, Blickensderfer A, Rachmiel E, Schaiff R, Kessels A, Braverman A, Goldberg A, Waterman B, Dunagan WC. An intervention to improve secondary prevention of coronary heart disease. *Arch Intern Med*. 2007;167:586-90.
8. Berner ES, Baker CS, Funkhouser E, Heudebert GR, Allison JJ, Fargason CA, Jr., Li Q, Person SD, Kiefe CI. Do local opinion leaders augment hospital quality improvement efforts? A randomized trial to promote adherence to unstable angina guidelines. *Med Care*. 2003;41:420-31.

9. Berwanger O, Guimaraes HP, Laranjeira LN, Cavalcanti AB, Kodama AA, Zazula AD, Santucci EV, Victor E, Tenuta M, Carvalho V, Mira VL, Pieper KS, Weber B, Mota LH, Peterson ED, Lopes RD. Effect of a multifaceted intervention on use of evidence-based therapies in patients with acute coronary syndromes in Brazil: the BRIDGE-ACS randomized trial. *JAMA*. 2012;307:2041-9.
10. Du X, Gao R, Turnbull F, Wu Y, Rong Y, Lo S, Billot L, Hao Z, Ranasinghe I, Iedema R, Kong L, Hu D, Lin S, Shen W, Huang D, Yang Y, Ge J, Han Y, Lv S, Ma A, Gao W, Patel A, CPACS-2 Investigators. Hospital quality improvement initiative for patients with acute coronary syndromes in China: a cluster randomized, controlled trial. *Circ Cardiovasc Qual Outcomes*. 2014;7:217-26.
11. Flather MD, Babalis D, Booth J, Bardaji A, Machecourt J, Opolski G, Ottani F, Bueno H, Banya W, Brady AR, Bojestig M, Lindahl B. Cluster-randomized trial to evaluate the effects of a quality improvement program on management of non-ST-elevation acute coronary syndromes: The European Quality Improvement Programme for Acute Coronary Syndromes (EQUIP-ACS). *Am Heart J*. 2011;162:700-707
12. Guenancia C, Stamboul K, Hachet O, Yameogo V, Garnier F, Gudjoncik A, Cottin Y, Lorgis L. Clinical effectiveness of the systematic use of the GRACE scoring system (in addition to clinical assessment) for ischaemic outcomes and bleeding complications in the management of NSTEMI compared with clinical assessment alone: a prospective study. *Heart Vessels*. 2016;31:897-906.
13. Heller RF, D'Este C, Lim LL, O'Connell RL, Powell H. Randomised controlled trial to change the hospital management of unstable angina. *Med J Aust*. 2001;174:217-21.
14. Kinsman LD, Rotter T, Willis J, Snow PC, Buykx P, Humphreys JS. Do clinical pathways enhance access to evidence-based acute myocardial infarction treatment in rural emergency departments? *Aust J Rural Health*. 2012;20:59-66.
15. Lytle BL, Li S, Lofthus DM, Thomas L, Poteat JL, Bhatt DL, Cannon CP, Fonarow GC, Peterson ED, Wang TY, Alexander KP. Targeted versus standard feedback: Results from a randomized quality improvement trial. *Am Heart J*. 2015;169:132-141.
16. Huffman MD, Mohanan PP, Devarajan R, Baldrige AS, Kondal D, Zhao L, Ali M, Krishnan MN, Natesan S, Gopinath R, Viswanathan S, Stigi J, Joseph J, Chozhakkat S, Lloyd-Jones DM, Prabhakaran D. Effect of a Quality Improvement Intervention on Clinical Outcomes in Patients in India With Acute Myocardial Infarction: The ACS QUIK Randomized Clinical Trial. *JAMA*. 2018;319:567-578.

17. Sauaia A, Ralston D, Schluter WW, Marciniak TA, Havranek EP, Dunn TR. Influencing care in acute myocardial infarction: a randomized trial comparing 2 types of intervention. *Am J Med Qual.* 2000;15:197-206.
18. Soumerai SB, McLaughlin TJ, Gurwitz JH, Guadagnoli E, Hauptman PJ, Borbas C, Morris N, McLaughlin B, Gao X, Willison DJ, Asinger R, Gobel F. Effect of local medical opinion leaders on quality of care for acute myocardial infarction: a randomized controlled trial. *JAMA.* 1998;279:1358-63.
19. Tu JV, Donovan LR, Lee DS, Wang JT, Austin PC, Alter DA, Ko DT. Effectiveness of public report cards for improving the quality of cardiac care: the EFFECT study: a randomized trial. *JAMA.* 2009;302:2330-7.
20. Wu Y, Li S, Patel A, Li X, Du X, Wu T, Zhao Y, Feng L, Billot L, Peterson ED, Woodward M, Kong L, Huo Y, Hu D, Chalkidou K, Gao R. Effect of a Quality of Care Improvement Initiative in Patients With Acute Coronary Syndrome in Resource-Constrained Hospitals in China: A Randomized Clinical Trial. *JAMA Cardiol.* 2019;4(5):418-427.
21. Alexander T, Mulasari AS, Joseph G, Kannan K, Veerasekar G, Victor SM, Ayers C, Thomson VS, Subban V, Gnanaraj JP, Narula J, Kumbhani DJ, Nallamothu BK. A system of care for patients with ST-segment elevation myocardial infarction in India. *JAMA Cardiol.* 2017;2:498-7.
22. Aziz EF, Javed F, Pulimi S, Pratap B, De Benedetti Zunino ME, Tormey D, Hong MK, Herzog E. Implementing a pathway for the management of acute coronary syndrome leads to improved compliance with guidelines and a decrease in angina symptoms. *J Healthc Qual.* 2012;34:5-14.
23. Carlhed R, Bojestig M, Wallentin L, Lindstrom G, Peterson A, Aberg C, Lindahl B, Quality Improvement in Coronary Care Study Group. Improved adherence to Swedish national guidelines for acute myocardial infarction: the Quality Improvement in Coronary Care (QUICC) study. *Am Heart J.* 2006;152:1175-81.
24. Carlhed R, Bojestig M, Peterson A, Aberg C, Garmo H, Lindahl B, Quality Improvement in Coronary Care Study Group. Improved clinical outcome after acute myocardial infarction in hospitals participating in a Swedish quality improvement initiative. *Circ Cardiovasc Qual Outcomes.* 2009;2:458-64.
25. Chen KC, Yen DHT, Chen CD, Young MS, Yin WH. Effect of emergency department in-hospital tele-electrocardiographic triage and interventional cardiologist activation of the infarct team on door-to-balloon times in st-segment-elevation acute myocardial infarction. *Am J of Cardiol.* 2011;107:1430-1435.

26. Dai X, Meredith D, Sawey E, Kaul P, Smith Jr SC, Stouffer GA. a quality improvement program for recognition and treatment of inpatient ST-segment elevation myocardial infarctions. *JAMA Cardiol.* 2016;1:1077-2.
27. Ellerbeck EF, Kresowik TF, Hemann RA, Mason P, Wiblin RT, Marciniak TA. Impact of quality improvement activities on care for acute myocardial infarction. *Int J Qual Health Care.* 2000;12:305-10.
28. Fakhr-Movahedi A, Soleimani M, Ghazvininejad R, Maher MK, Ghorbani R. Effect of patient-focused clinical pathway on anxiety, depression and satisfaction of patients with coronary artery disease: a quasi-experimental study. *Iran Red Crescent Med J.* 2015;17:1-10.
29. Kuo F-Y, Huang W-C, Chiou K-R, Mar G-Y, Cheng C-C, Chung C-C, Tsai H-L, Jiang C-H, Wann S-R, Lin S-L, Liu C-P. The effect of failure mode and effect analysis on reducing percutaneous coronary intervention hospital door-to-balloon time and mortality in ST segment elevation myocardial infarction. *BMJ Qual Saf.* 2013;22:626-638.
30. Fonarow GC, Gawlinski A, Watson K. In-hospital initiation of cardiovascular protective therapies to improve treatment rates and clinical outcomes. *Crit Path Cardiol.* 2003;2:61-70.
31. Khot UN, Johnson ML, Ramsey C, Khot MB, Todd R, Shaikh SR, Berg WJ. Emergency department physician activation of the catheterization laboratory and immediate transfer to an immediately available catheterization laboratory reduce door-to-balloon time in ST-elevation myocardial infarction. *Circulation.* 2007;116:67-76.
32. Lai C-L, Fan C-M, Liao P-C, Tsai K-C, Yang C-Y, Chu S-H, Chien K-L. Impact of an audit program and other factors on door-to-balloon times in acute ST-elevation myocardial infarction patients destined for primary coronary intervention. *Acad Emerg Med.* 2009;16:333-342.
33. Prabhakaran D, Jeemon P, Mohanan PP, Govindan U, Geevar Z, Chaturvedi V, Reddy KS. Management of acute coronary syndromes in secondary care settings in Kerala: Impact of a quality improvement programme. *Natl Med J India* 2008;21:107-111.
34. Scholz KH, Maier SKG, Jung J, Fleischmann C, Werner GS, Olbrich HG, Ahlersmann D, Keating FK, Jacobshagen C, Moehlis H, Hilgers R, Maier LS. Reduction in treatment times through formalized data feedback. *JACC Cardiovasc Interv.* 2012;5:848-857.

35. Robinson MB, Thompson E. Evaluation of the effectiveness of guidelines, audit and feedback: improving the use of intravenous thrombolysis in patients with suspected acute myocardial infarction. *Int J Qual Health Care*. 2005;8:211-222.
36. Scott IA, Eyeson-Annan ML, Huxley SL, West MJ. Optimising care of acute myocardial infarction: results of a regional quality improvement project. *J Qual Clin Pract*. 2000;20:12-9.
37. Scott IA, Coory MD, Harper CM. The effects of quality improvement interventions on inhospital mortality after acute myocardial infarction. *Med J Aust*. 2001;175:465-70.
38. Scott IA. Optimising care of acute coronary syndromes in three Australian hospitals. *Int J Qual Health Care*. 2004;16:275-284.
39. Rowe AK, Rowe SY, Peters DH, Holloway KA, Chalker J, Ross-Degnan D. Effectiveness of strategies to improve health-care provider practices in low-income and middle-income countries: a systematic review. *Lancet Glob Health*. 2018;6:e1163-e1175.

## Data Supplement 9. References of excluded studies and reasons for exclusion

1. Bringolf J, Elliott SB, Miller CD, Riley RF, Hiestand BC, Mahler SA. Emergency Physician Adherence to a Chest Pain Risk Stratification Decision Aid. *Annals of Emergency Medicine*. Elsevier; 2014 Oct;64(4):S16–47. [wrong patient population]
2. Takakuwa KM, Burek GA, Estepa AT, Shofer FS. A Method for Improving Arrival-to-electrocardiogram Time in Emergency Department Chest Pain Patients and the Effect on Door-to-balloon Time for ST-segment Elevation Myocardial Infarction. *Academic Emergency Medicine*. Blackwell Publishing Ltd; 2009 Oct;16(10):921–7. [wrong patient population]
3. Bernal DDL, Stafford L, Bereznicki LRE, Castelino RL, Davidson PM, Peterson GM. A minimal-contact intervention for cardiac inpatients: long-term effects on smoking cessation. *Trials*. BioMed Central; 2012 Apr 2;13(1):30. [wrong setting]
4. Thompson DR, Meddis R. A prospective evaluation of in-hospital counselling for first time myocardial infarction men. *Journal of Psychosomatic Research*. Elsevier; 1990 Jan;34(3):237–48. [wrong setting]
5. Thompson DR. A randomized controlled trial of in-hospital nursing support for first time myocardial infarction patients and their partners: effects on anxiety and depression. *J Adv Nurs*. Blackwell Publishing Ltd; 1989 Apr;14(4):291–7. [duplicate]
6. Mooney M, McKee G, Fealy G, F OB, O'Donnell S, Moser D. A randomized controlled trial to reduce prehospital delay time in patients with acute coronary syndrome (ACS). [wrong setting]
7. Mooney M, McKee G, Fealy G, O'Brien F, O'Donnell S, Moser D. A review of interventions aimed at reducing pre-hospital delay time in acute coronary syndrome: what has worked and why? *European Journal of Cardiovascular Nursing*. 2012 Dec;11(4):445–53. [wrong study design]
8. Park LG, Howie-Esquivel J, Chung ML, Dracup K. A text messaging intervention to promote medication adherence for patients with coronary heart disease: A randomized controlled trial. *Patient Education and Counseling*. Elsevier; 2014 Feb;94(2):261–8. [wrong setting]
9. Beck CA, Richard H, Tu JV, Pilote L. Administrative Data Feedback for Effective Cardiac Treatment. *JAMA*. American Medical Association; 2005 Jul 20;294(3):309–17. [wrong outcomes]
10. Cohen A, Assyag P, Boyer-Chatenet L, Cohen-Solal A, Perdrix C, Dalichampt M, et al. An education program for risk factor management after an acute coronary syndrome: a randomized clinical trial. *JAMA Internal Medicine*. 174(1):40–8. [wrong setting]
11. van Tulder R, Roth D, Weiser C, Heidinger B, Herkner H, Schreiber W, et al. An electrocardiogram technician improves in-hospital first medical contact-to-electrocardiogram times: a cluster randomized controlled interventional trial. *The American Journal of Emergency Medicine*. Elsevier; 2012 Nov;30(9):1729–36. [wrong intervention]
12. Jeong HS, Chae JS, Moon JS, Yoo YS. An Individualized Teaching Program for Atherosclerotic Risk Factor Reduction in Patients with Myocardial Infarction. *Yonsei Med J*. 2002;43(1):93. [wrong patient population]

13. Peterson ED, Roe MT, Mulgund J, DeLong ER, Lytle BL, Brindis RG, et al. Association Between Hospital Process Performance and Outcomes Among Patients With Acute Coronary Syndromes. *JAMA*. American Medical Association; 2006 Apr 26;295(16):1912–20. [review]
14. Cantor MN, Lavarias V, Lam S, Mount L, Laskova V, Nakhamiyayev V, et al. Barriers to Implementing a Surgical Beta-Blocker Protocol. *The Joint Commission Journal on Quality and Patient Safety*. Elsevier; 2005 Nov;31(11):640–8. [wrong intervention]
15. Hajek P, Taylor TZ, Mills P. Brief intervention during hospital admission to help patients to give up smoking after myocardial infarction and bypass surgery: randomised controlled trial. *BMJ*. British Medical Journal Publishing Group; 2002 Jan 12;324(7329):87–9. [wrong setting]
16. Bertelsen JB, Refsgaard J, Kanstrup H, Johnsen SRP, Qvist I, Christensen B, et al. Cardiac rehabilitation after acute coronary syndrome comparing adherence and risk factor modification in a community-based shared care model versus hospital-based care in a randomised controlled trial with 12 months of follow-up. *European Journal of Cardiovascular Nursing*. 2016 Sep 23;16(4):334–43. [wrong intervention]
17. Choi YJ, Park JS, Kim U, Lee SH, Son JW, Shin DG, et al. Changes in smoking behavior and adherence to preventive guidelines among smokers after a heart attack. *Journal of Geriatric Cardiology*. 2013 Jun 10; 2:146-50. [wrong population]
18. Charlson ME, Peterson JC, Boutin-Foster C, Briggs WM, Ogedegbe GG, McCulloch CE, et al. Changing health behaviors to improve health outcomes after angioplasty: a randomized trial of net present value versus future value risk communication. *Health Education Research*. 2007 Nov 17;23(5):826–39. [wrong population, wrong comparator]
19. Wang L, Zhang M, Guo L, Qi J, Luo H, He H, et al. Clinical Pathways Based on Integrative Medicine in Chinese Hospitals Improve Treatment Outcomes for Patients with Acute Myocardial Infarction: A Multicentre, Nonrandomized Historically Controlled Trial. *Evidence-Based Complementary and Alternative Medicine*. Hindawi Publishing Corporation; 2012;2012(4):1–8. [wrong study design]
20. El-Deeb MH, Al-Riyami AM, Sulaiman KJ, Al-Riyami AA, Al-Mukhaini M, Al-Rawahi N, et al. Clinical Pathways for Non-ST Elevation Acute Coronary Syndrome in Oman: An Oman Heart Association Protocol for Hospital Quality Improvement Initiative. *Oman Med J*. 2014 Jan 20;29(1):8–11. [review]
21. Carroll DL, Rankin SH. Comparing Interventions in Older Unpartnered Adults after Myocardial Infarction. *European Journal of Cardiovascular Nursing*. 2006 Mar;5(1):83–9. [wrong setting]
22. Fang R, Jiang Y, Song J, Cheng G, Xue G. Control study of general psychological intervention for patients with myocardial infarction. *Chinese Journal of Clinical Rehabilitation*. 7(9). [wrong study design]
23. Kildemoes HW, Kristiansen ISN. Cost-effectiveness of interventions to reduce the thrombolytic delay for acute myocardial infarction. *J of Inter Tech of Health Care*. Cambridge University Press; 2004 Aug 1;20(03):368–74. [wrong study design]
24. Holmes-Rovner M, Stommel M, Corser WD, Olomu A, Holtrop JS, Siddiqi A, et al. Does Outpatient Telephone Coaching Add to Hospital Quality Improvement Following



- Hospitalization for Acute Coronary Syndrome? *J Gen Intern Med*. 2nd ed. Springer-Verlag; 2008 Jul 10;23(9):1464–70. [wrong setting]
25. Weibel L, Massarotto P, Hediger H, Mahrer-Imhof R. Early education and counselling of patients with acute coronary syndrome. A pilot study for a randomized controlled trial. *European Journal of Cardiovascular Nursing*. 3rd ed. 2016 Jun;15(4):213–22. [wrong study design]
  26. Martin JS, Litwin PE, Weaver WD. Early recognition and treatment of the patient suffering from acute myocardial infarction: a description of the myocardial infarction triage and intervention project. *Critical Care Nursing Clinics of North America*. 2(4):681–8. [wrong study design]
  27. Jorstad HT, Birgelen von C, Alings AMW, Liem A, van Dantzig JM, Jaarsma W, et al. Effect of a nurse-coordinated prevention programme on cardiovascular risk after an acute coronary syndrome: main results of the RESPONSE randomized trial. *Heart*. BMJ Publishing Group Ltd and British Cardiovascular Society; 2013 Sep 5;99(19):1421–30. [wrong intervention]
  28. Kripalani S, Roumie CL, Dalal AK, Cawthon C, Businger A, Eden SK, et al. Effect of a pharmacist intervention on clinically important medication errors after hospital discharge: a randomized trial. [Summary for patients in *Ann Intern Med*. 2012 Jul 3;157(1):1–32; PMID: 22751776]. *Ann Intern Med*. American College of Physicians; 2012 Jul 3;157(1):1–10. [wrong outcomes]
  29. Kripalani S, Roumie CL, Dalal AK, Cawthon C, Businger A, Eden SK, et al. Effect of a Pharmacist Intervention on Clinically Important Medication Errors After Hospital Discharge: A Randomized Trial. *Ann Intern Med*. American College of Physicians; 2012 Jul 3;157(1):1–10. [wrong outcomes]
  30. Mu iz Garc a J, G mez Dobl as JJ, Santiago P rez MAI, de Teresa Galv n E, Cruz Fern ndez JM, Castro Beiras A. Effect of a Simple Educational Program for Physicians on Adherence to Secondary Prevention Measures After Discharge Following Acute Coronary Syndrome. The CAM Project. *Revista Espa?ola de Cardiolog?a (English Edition)*. 2004 Nov;57(11):1017–28. [wrong setting]
  31. Bell SP, Schnipper JL, Goggins K, Bian A, Shintani A, et al. Effect of Pharmacist Counseling Intervention on Health Care Utilization Following Hospital Discharge: A Randomized Control Trial. *J GEN INTERN MED*. 2016 Feb 16;31(5):470–7. [wrong outcomes]
  32. Aitken LM, Pelter MM, Carlson B, Marshall AP, Cross R, McKinley S, et al. Effective Strategies for Implementing a Multicenter International Clinical Trial. *Journal of Nursing Scholarship*. Blackwell Publishing Inc; 2008 Jun;40(2):101–8. [wrong population]
  33. Fors A, Gyllensten H, Swedberg K, Ekman I. Effectiveness of person-centred care after acute coronary syndrome in relation to educational level: Subgroup analysis of a two-armed randomised controlled trial. *International Journal of Cardiology*. Elsevier; 2016 Oct 15;221:957–62. [wrong setting]
  34. Adams GL, Campbell PT, Adams JM, Strauss DG, Wall K, Patterson J, et al. Effectiveness of Prehospital Wireless Transmission of Electrocardiograms to a Cardiologist Via Hand-Held Device for Patients With Acute Myocardial Infarction (from the Timely Intervention in

- Myocardial Emergency, NorthEast Experience [TIME-NE]). *The American Journal of Cardiology*. 2006 Nov;98(9):1160–4. [wrong setting]
35. Adams GL, Campbell PT, Adams JM, Strauss DG, Wall K, Patterson J, et al. Effectiveness of Prehospital Wireless Transmission of Electrocardiograms to a Cardiologist Via Hand-Held Device for Patients With Acute Myocardial Infarction (from the Timely Intervention in Myocardial Emergency, NorthEast Experience [TIME-NE]). *American Journal of Cardiology*. Elsevier; 2006 Nov 1;98(9):1160–4. [wrong setting]
  36. Kirchberger I, Hunger M, Stollenwerk BR, Seidl H, Burkhardt K, Kuch B, et al. Effects of a 3-Year Nurse-Based Case Management in Aged Patients with Acute Myocardial Infarction on Rehospitalisation, Mortality, Risk Factors, Physical Functioning and Mental Health. A Secondary Analysis of the Randomized Controlled KORINNA Study. Thombs B, editor. *Circ. Public Library of Science*; 2015 Mar 26;10(3):e0116693. [wrong setting]
  37. Mazzaglia G, Piccinni C, Filippi A, Sini G, Lapi F, Sessa E, et al. Effects of a computerized decision support system in improving pharmacological management in high-risk cardiovascular patients: A cluster-randomized open-label controlled trial. *Health Informatics Journal*. 2016 May 27;22(2):232–47. [wrong patient population]
  38. Abbaszadeh A, Borhani F, Asadi N. Effects of health belief model-based video training about risk factors on knowledge and attitude of myocardial infarction patients after discharge. *Journal of Research in Medical Sciences*. 16(2). [wrong intervention]
  39. Johnston N, Bodegard J, Jerström S, Kesson J, Brorsson H, Alfredsson J, et al. Effects of interactive patient smartphone support app on drug adherence and lifestyle changes in myocardial infarction patients: A randomized study. *American Heart Journal*. 2016 Aug;178:85–94. [wrong intervention]
  40. Echeverry D, Dike M, Jovanovic L, Wollitzer AO, Westphal S, Mudaliar S, et al. Efforts to improve subsequent treatment of cardiovascular risk factors in older patients with diabetes hospitalized for a cardiac event. *Am J of Manag Care*. 11(12):758–64. [wrong patient population]
  41. Investigators E. Enhancing Recovery in Coronary Heart Disease (ENRICHD) study intervention: rationale and design. *Psychosomatic Medicine*. 63(5):747–55. [wrong intervention]
  42. GAP program improves patients' quality of care: CMs critical to the process. *Guidelines Applied in Practice initiative*. *Hospital Case Management*. 10(6):85–93. [review]
  43. Mayou RA, Thompson DR, Clements A, Davies CH, Goodwin SJ, Normington K, et al. Guideline-based early rehabilitation after myocardial infarction. *Journal of Psychosomatic Research*. 2002 Feb;52(2):89–95. [wrong setting]
  44. Shui Y, Ling S, Letian L, Zeyu Q, Xiaosu Z. GW25-e1425 The effect of diversified health education on myocardial infarction patients with anxiety and depression. *Journal of the American College of Cardiology*. 2014 Oct;64(16):C244. [wrong setting]
  45. Bernal DDL, Stafford L, Bereznicki LRE, Castelino RL, Davidson PM, Peterson GM. Home medicines reviews following acute coronary syndrome: study protocol for a randomized controlled trial. *Trials*. BioMed Central; 2012 Apr 2;13(1):1844. [wrong setting]

46. Cannon CP, Ornato JP. How to Develop a Critical Pathway. *Critical Pathways in Cardiology A Journal of Evidence-Based Medicine*. 2002 Mar;1(1):53–60. [protocol]
47. Bestul MB, McCollum M, Stringer KA, Burchenal J. Impact of a critical pathway on acute myocardial infarction quality indicators. *Pharmacotherapy: The Journal of Human Pharmacology and Drug Therapy*. Blackwell Publishing Ltd; 2004 Feb 1;24(2):173–8. [wrong study design]
48. Mateti UV, Ummer J, Kodangala S. Impact of Clinical Pharmacist Counselling and Education on Quality of Life in Patients with Acute Coronary Syndrome. *IJPER*. 2016 Aug 1;50(3):360–7. [wrong setting]
49. Tzeng I-S, Liu S-H, Chen K-F, Wu C-C, Chen J-C. Impact of performance grading on annual numbers of acute myocardial infarction-associated emergency department visits in Taiwan. *Medicine*. 2016 Oct;95(42):e4937. [wrong outcomes]
50. Bringolf J, Elliott SB, Miller CD, Riley RF, Hiestand BC, Mahler SA, et al. Impacts of intensive follow-up on the long-term prognosis of percutaneous coronary intervention in acute coronary syndrome patients - A single center prospective randomized controlled study in a Chinese population. *Annals of Emergency Medicine*. Elsevier; 2014 Oct 1;64(4):S16–47. [wrong patient population]
51. O'Brien F, McKee G, Mooney M, O'Donnell S, Moser D. Improving knowledge, attitudes and beliefs about acute coronary syndrome through an individualized educational intervention: A randomized controlled trial. *Patient Education and Counseling*. Elsevier; 2014 Aug 1;96(2):179–87. [wrong setting]
52. O'Brien F, McKee G, Mooney M, O'Donnell S, Moser D. Improving knowledge, attitudes and beliefs about acute coronary syndrome through an individualized educational intervention: A randomized controlled trial. *Patient Education and Counseling*. Elsevier; 2014 Aug;96(2):179–87. [wrong setting]
53. Amin A. Improving the management of patients after myocardial infarction, from admission to discharge. *Clinical Therapeutics*. 2006 Oct;28(10):1509–39. [wrong study design]
54. Houle J, Doyon O, Vadeboncoeur N, Turbide G, Diaz A, Poirier P. Innovative program to increase physical activity following an acute coronary syndrome: Randomized controlled trial. *Patient Education and Counseling*. Elsevier; 2011 Dec;85(3):e237–44. [wrong setting]
55. Stagmo M, Westin L, Carlsson R, Israelsson B. Long-Term Effects on Cholesterol Levels and the Utilization of Lipid-Lowering Drugs of a Hospital-Based Programme for Secondary Prevention of Coronary Artery Disease. *European Journal of Cardiovascular Prevention & Rehabilitation*. 2001 Aug 1;8(4):243–8. [wrong intervention]
56. Redfern J, Ellis E, Briffa T, Freedman SB. Modular prevention of heart disease following acute coronary syndrome (ACS) [ISRCTN42984084]. *BMC Cardiovasc Disord*. 2nd ed. BioMed Central; 2006 Jun 9;6(1):S65. [wrong intervention]
57. Ho PM, Lambert-Kerzner A, Carey EP, Fahdi IE, Bryson CL, Melnyk SD, et al. Multifaceted Intervention to Improve Medication Adherence and Secondary Prevention Measures After Acute Coronary Syndrome Hospital Discharge. *JAMA Internal Medicine*. American Medical Association; 2014 Feb 1;174(2):186–93. [wrong intervention]

58. Brown DW. Nurse-led intervention increases smoking cessation among people with coronary heart disease. *Evidence-based Healthcare*. 2004 Jun;8(3):128–30. [wrong outcomes]
59. Roncella A, Pristipino C, Cianfrocca C, Scorza S, Pasceri V, Pelliccia F, et al. One-year results of the randomized, controlled, short-term psychotherapy in acute myocardial infarction (STEP-IN-AMI) trial. *International Journal of Cardiology*. Elsevier; 2013 Dec;170(2):132–9. [wrong setting]
60. Aghakhani N. P-1005 - Effect of education on anxiety and depression in hospitalized patients with myocardial infarction in Urmia, Iran. *European Psychiatry*. 2012 Jan;27:1.[wrong study design]
61. Lambert-Kerzner A, Del Giacco EJ, Fahdi IE, Bryson CL, Melnyk SD, Bosworth HB, et al. Patient-Centered Adherence Intervention After Acute Coronary Syndrome Hospitalization. *Circulation: Cardiovascular Quality and Outcomes*. American Heart Association, Inc; 2012 Jul 17;5(4):571–6. [wrong intervention]
62. Glickman SW, Ou F-S, DeLong ER, Roe MT, Lytle BL, Mulgund J, et al. Pay for Performance, Quality of Care, and Outcomes in Acute Myocardial Infarction. *JAMA*. American Medical Association; 2007 Jun 6;297(21):2373–80. [wrong study design]
63. Alexander KP, Peterson ED, Granger CB, Casas AC, Van de Werf F, Armstrong PW, et al. Potential impact of evidence-based medicine in acute coronary syndromes: insights from GUSTO-IIb. *Journal of the American College of Cardiology*. 1998 Dec;32(7):2023–30. [wrong study design]
64. Chew DP, Huynh LT, Liew D, Astley C, Soman A, Brieger D. Potential survival gains in the treatment of myocardial infarction. *Health Education Research*. Oxford University Press; 2008 Oct 1;23(5):826–39. [wrong study design]
65. Broadbent E, Leggat A, McLachlan A, Kerr A. Providing cardiovascular risk management information to acute coronary syndrome patients: A randomized trial. *British Journal of Health Psychology*. Blackwell Publishing Ltd; 2012 Jun 19;18(1):83–96. [wrong setting]
66. Butterly JR. Quality Improvement in the Interventional Treatment of Acute Myocardial Infarction: 5 Health Care Systems and Their Innovative Solutions to Regional Challenges. *Progress in Cardiovascular Diseases*. Elsevier; 2010 Nov;53(3):181–2. [Review]
67. Staman KL, Roe MT, Fraulo ES, Lytle BL, Gibler WB, Ohman EM, et al. Quality Improvement Tools Designed to Improve Adherence to the ACC/AHA Guidelines for the Care of Patients with Non-ST-Segment Acute Coronary Syndromes. *Critical Pathways in Cardiology A Journal of Evidence-Based Medicine*. 2003 Mar;2(1):34–40. [Review]
68. Jolly K, Bradley F, Sharp S, Smith H, Thompson S, Kinmonth AL, et al. Randomised controlled trial of follow up care in general practice of patients with myocardial infarction and angina: final results of the Southampton heart integrated care project (SHIP). *BMJ*. British Medical Journal Publishing Group; 1999 Mar 13;318(7185):706–11. [wrong setting]
69. Jolly K, Bradley F, Sharp S, Smith H, Thompson S, Kinmonth AL, et al. Randomised controlled trial of follow up care in general practice of patients with myocardial infarction and angina: final results of the Southampton heart integrated care project (SHIP). *BMJ*. British Medical Journal Publishing Group; 1999 Mar 13;318(7185):706–11. [wrong setting]

70. Quist-Paulsen P. Randomised controlled trial of smoking cessation intervention after admission for coronary heart disease. *BMJ. British Medical Journal Publishing Group*; 2003 Nov 29;327(7426):1254–7. [wrong intervention]
71. Feeney GFX, McPherson A, Connor JP, McAlister A, Young RM, Garrahy P. Randomized controlled trial of two cigarette quit programmes in coronary care patients after acute myocardial infarction. *Intern Med J. Blackwell Science Pty*; 2001 Nov 4;31(8):470–5. [wrong setting]
72. Doll JA, Wang TY, Choudhry NK, Cannon CP, Cohen DJ, Fonarow GC, et al. Rationale and design of the Affordability and Real-world Antiplatelet Treatment Effectiveness after Myocardial Infarction Study (ARTEMIS): A multicenter, cluster-randomized trial of P2Y 12 receptor inhibitor copayment reduction after myocardial infarction. *American Heart Journal. Elsevier*; 2016 Jul;177:33–41.[protocol]
73. Ellahham MD S, Aljabbari S, Harold Mananghaya T, J Raji S, Zubaidi AI A. Reducing Door to- Balloon- Time for Acute ST Elevation Myocardial Infarction In Primary Percutaneous Intervention: Transformation using Robust Performance Improvement. *BMJ Qual Improv Report. British Medical Journal Publishing Group*; 2015 Jan 16;4(1):u207849.w3309. [wrong study design]
74. Samer Ellahham MD, Aljabbari S, Mananghaya TH, Raji SJ, Zubaidi AI A. Reducing Door to- Balloon- Time for Acute ST Elevation Myocardial Infarction In Primary Percutaneous Intervention: Transformation using Robust Performance Improvement. *BMJ Qual Improv Report. British Medical Journal Publishing Group*; 2015 Jan 1;4(1):u207849.w3309. [wrong study design]
75. Yudi MB, Clark DJ, Tsang D, Jelinek M, Kalten K, Joshi S, et al. SMARTphone-based, early cardiac REHABilitation in patients with acute coronary syndromes [SMART-REHAB Trial]: a randomized controlled trial protocol. *BMC Cardiovasc Disord. BioMed Central*; 2016 Sep 5;16(1):107. [wrong outcomes]
76. Taylor CB. Smoking Cessation after Acute Myocardial Infarction: Effects of a Nurse-Managed Intervention. *Ann Intern Med. American College of Physicians*; 1990 Jul 15;113(2):118–23. [wrong setting]
77. Arnold J, Goodacre S, Morris F, on behalf of the ESCAPE Research Team. Structure, process and outcomes of chest pain units established in the ESCAPE Trial. *Emergency Medicine Journal. British Association for Accident and Emergency Medicine*; 2007 Jul 1;24(7):462–6. [wrong patient population]
78. Danchin N. Systems of Care for ST-Segment Elevation Myocardial Infarction. *JACC Cardiovasc Interv. 2009 Oct*;2(10):901–8. [Review]
79. Babalis D, Banya W, Cowie MR, Flather MD. The effect of patient and centre characteristics on the outcome of a multi-faceted quality improvement programme. *European Heart Journal. 36:60. [Duplicate]*
80. Kamal K, Nader A. The effect of written material and verbal method education on anxiety and depression in myocardial infarction patients in educational hospitals. *European Heart Journal: Acute Cardiovascular Care. 3(2):124. [wrong study]*

81. Khalifehzadeh A, Jahromi MK, Yazdannik A. The impact of Synergy Model on nurses' performance and the satisfaction of patients with acute coronary syndrome. *Iranian Journal of Nursing and Midwifery Research*. [wrong outcomes]
82. Katz DA, Aufderheide TP, Bogner M, Rahko PR, Brown RL, Brown LM, et al. The Impact of Unstable Angina Guidelines in the Triage of Emergency Department Patients with Possible Acute Coronary Syndrome. *Medical Decision Making*. 2006 Nov 1;26(6):606–16. [wrong outcomes]
83. Wang TY, Dai D, Hernandez AF, Bhatt DL, Heidenreich PA, Fonarow GC, et al. The Importance of Consistent, High-Quality Acute Myocardial Infarction and Heart Failure Care. *Journal of the American College of Cardiology*. 2011 Aug;58(6):637–44. [wrong study design]
84. Olivari Z, Steffenino G, Savonitto S, Chiarella F, Chinaglia A, Lucci D, et al. The management of acute myocardial infarction in the cardiological intensive care units in Italy: the 'BLITZ 4 Qualit' campaign for performance measurement and quality improvement. *European Heart Journal: Acute Cardiovascular Care*. 2012 Jun;1(2):143–52. [wrong study design]
85. The Community Pharmacy Medicines Management Project Evaluation Team. The MEDMAN study: a randomized controlled trial of community pharmacy-led medicines management for patients with coronary heart disease. *Family Practice*. 2007 Jan 8;24(2):189–200. [wrong population]
86. Oranta O, Luutonen S, Salokangas RK, Vahlberg T, Leino-Kilpi H. The outcomes of interpersonal counselling on depressive symptoms and distress after myocardial infarction. *BMJ*. 2010 Apr 14;64(2):78–86. [wrong setting]
87. Oranta O, Luutonen S, Salokangas RK, Vahlberg T, Leino-Kilpi H. The outcomes of interpersonal counselling on depressive symptoms and distress after myocardial infarction. *BMJ*. 2010 Apr 14;64(2):78–86. [duplicate]
88. Katz DA. The use of empiric clinical data in the evaluation of practice guidelines for unstable angina. *JAMA: The Journal of the American Medical Association*. 1996 Nov 20;276(19):1568–74. [wrong outcomes]
89. Top-performing cardiovascular hospitals boast better outcomes, lower costs, shorter LOS. *Senior Care Management*. [review]
90. Cameron LD, Petrie KJ, Ellis CJ, Buick D, Weinman JA. Trait negative affectivity and responses to a health education intervention for myocardial infarction patients. *Psychology & Health*. 2005 Feb;20(1):1–18. [wrong setting]
91. Van Tulder R, Roth D, Weiser C, Heidinger B, Herkner H, Schreiber W, et al. Uptake and efficacy of a systematic intensive smoking cessation intervention using motivational interviewing for smokers hospitalised for an acute coronary syndrome: a multicentre before-after study with parallel group comparisons. *The American Journal of Emergency Medicine*. Elsevier; 2012 Nov 1;30(9):1729–36. [wrong patient population]
